1 **Variation in Soil Properties under Long-Term Irrigated and Non-Irrigated Cropping and**  
2 **Other Land-Use Systems in Dura Catchment, Northern Ethiopia**

3 **Gebreyesus Brhane Tesfahunegn<sup>1,\*</sup>, Teklebirhan Arefaine Gebru<sup>2</sup>**

4 <sup>1</sup>Department of Soil Resources and Watershed Management, College of Agriculture,  
5 P.O. Box 314, Aksum University, Shire-Campus, Shire, Ethiopia

6 <sup>2</sup>Department of Water resource and Irrigation Engineering, School of Water Technology,  
7 P.O. Box 314, Aksum University, Shire-Campus, Shire, Ethiopia

8 <sup>\*</sup>These authors contributed equally to this work, except that of project coordination and paper drafted  
9 which were contributed by the lead author.

10

11

12

13

14

15

16 <sup>\*</sup>Corresponding: G.B. Tesfahunegn, Tel.: +251 34 444 4899; Fax: +251 34 444 4898;

17 E-mail: [gebre33@gmail.com](mailto:gebre33@gmail.com)

## 19 Abstract

20 There are limited reports about the impacts of long-term irrigated and non-irrigated cropping and  
21 land-use systems (CLUS) on soil properties and nutrient stocks under smallholder farmers'  
22 conditions in developing countries. The objective of this research was to examine variation in  
23 soil properties and OC and TN stocks across the different CLUS in Dura sub-catchment,  
24 northern Ethiopia. Surveys and discussions on field history were used to identify nine CLUS,  
25 namely, tef (*Eragrostis tef* (Zucc) Trot) mono-cropping (TM), maize (*Zea mays L.*) mono-  
26 cropping (MM), cauliflower (*Brassica oleracea var. botrytis*)-maize intercropping (IC1), red  
27 beet (*Beta Vulgaris*)-maize intercropping (IC2), cauliflower-tef-maize rotation (R1), onion  
28 (*Allium cepa L.*)-maize-onion rotation (R2), treated gully (TG), untreated gully (UTG), and  
29 natural forest system (NF). A total of 27 composite soil samples were collected randomly from  
30 the CLUS for laboratory analysis. Data were subjected to one-way analysis of variance and PCA.  
31 The lowest and highest bulk density was determined from NF (1.19 Mg m<sup>-3</sup>) and UTG (1.77 Mg  
32 m<sup>-3</sup>), respectively. Soil pH, EC and CEC varied significantly among the CLUS. The highest CEC  
33 (50.3 cmol<sub>c</sub> kg<sup>-1</sup>) was under TG followed by NF. The highest soil OC stock (113.6 Mg C ha<sup>-1</sup>)  
34 and TN stock (12.2 Mg C ha<sup>-1</sup>) were found from NF. The PCA chosen soil properties explained  
35 87% of the soil quality variability among the CLUS. Such soil properties and nutrient stocks  
36 variability among the CLUS suggested that introduction of suitable management practices are  
37 crucial for sustaining the soil system of the other CLUS.

38

39 **Key words:** Cropping system; Soil organic carbon stock; Soil total nitrogen stock; Soil quality

40 **Abbreviations:** OC, organic carbon; TN, total nitrogen; EC, electrical conductivity; CEC, cation  
41 exchangeable capacity; Ex Na, Ex Ca, and Ex Mg, exchangeable sodium, calcium, magnesium,  
42 respectively; Pav, available phosphorus; A<sub>h</sub>, depth of A-horizon; PCA, principal component analysis.

43

44

45

46

47

48

49

## 50 **Introduction**

51 Soil quality is becoming an important resource to raise crop productivity so that to meet the food  
52 required for the current and future population in developing countries as their economy mainly  
53 depends on agriculture [1-6]. Soil quality is defined as the capacity of the soil to give the  
54 intended functions for biomass and yield production [7-9]. In this study, the term soil quality is  
55 used synonymously with soil health. Recently, however, soil quality degradation caused by  
56 inappropriate cropping system, and land-use and soil management practices, has been reported  
57 among the top development challenges that demand urgent remedial actions. Several reports  
58 have shown that soil nutrient depletion and soil physical degradation are the dominant types of  
59 degradation associated with land and soil mis-management practices in the semi-arid areas [10-  
60 15].

61 Soil degradation poses serious development challenges in many developing countries  
62 including Ethiopia. Soil degradation induced by land and soil mis-management systems coupled  
63 with high dependency on erratic and unreliable rain-fed farming system has aggravated the  
64 problem of food insecurity in Ethiopia. Against such problem, irrigation agriculture has been  
65 suggested for implementing in the conditions of Ethiopia. For example, over 50 micro-dams  
66 were built-up since 1995, for being used mainly for irrigation purpose by smallholder farmers in  
67 the Tigray region, northern Ethiopia. Using the micro-dams in the region, so far a great deal of  
68 efforts has been attempted to achieve on sustainable economic, social and ecological  
69 developments. However, the sustainability of economic and ecological benefits from the micro-  
70 dams has been challenged by anthropogenic factors that increase sedimentation, soil and  
71 nutrients loadings and lowering of water use efficiency. Such factors have aggravated the rates of  
72 siltation of the micro-dams with less than 25% of their lifetime in Tigray region [16-19].

73 Even though there are problems of siltation and inefficient water use, irrigation agriculture  
74 from micro-dams as water source is becoming an essential government strategy for maximizing  
75 crop production per unit land area in Ethiopia conditions [20, 21]. Irrigation is designed to  
76 increase soil water availability and thereby enhances biomass production. The biomass is partly  
77 expected to be returned to the soil system to improve soil organic carbon (OC) and total nitrogen  
78 (TN) concentrations. Other practices such as reforestation of protected landscape, and  
79 agroforestry in agricultural lands have practiced to increase soil organic matter and soil nutrients  
80 for the past three decades in Ethiopia [9, 22- 24]. Many researchers (e.g., Sharma et al. [4]; Lal  
81 [25]; Mandal et al. [26]; Yesilonis et al. [27]) have also reported that planting suitable crop types

82 and cropping systems can play an important role in maintaining soil nutrients such as OC and TN  
83 stocks. However, increasing demand for short-term production encourages farmers to cultivate  
84 continuously (mono-cropping), overgrazed fields, or removed much of the above ground  
85 biomass through fuel collection, livestock feed and building materials. Eventually, such practices  
86 reduce soil nutrients and water holding capacity, increases erosion and thereby reduce  
87 agricultural productivity. For example, comparable higher OC, TN and other soil nutrients have  
88 reported under grassland as compared to cultivated land-use type [4, 14, 25, 28, 29]. However,  
89 there are limited quantitative evidences that evaluate soil properties variation under different  
90 cropping systems within the cultivated land-use type and compare with other land-use systems  
91 managed by smallholder farmers.

92 To maintain soil quality and reduce crop failures, intercropping which defined as the  
93 agricultural practice of cultivating two or more crops simultaneously in the same piece of land,  
94 has also reported by many researchers (e.g., Dallal [30]; Sharaiha et al. [31]; Nursima [32]).  
95 Intercropping is practiced commonly under irrigated agriculture and sometimes in rain-fed  
96 agriculture in northern Ethiopia even though their ecological benefits over the other cropping  
97 systems such as mono-cropping, rotation are not well documented (personal observation). The  
98 existing literatures have also shown that there is a need to understand impacts of continuous and  
99 other types of cropping systems on soil quality indicators in order to take appropriate measures  
100 that enhance sustainable crop production. The sustainability of soil for agricultural production  
101 can be viewed using soil properties as soil quality indicators (e.g., Arshad and Martin [2];  
102 Trivedi et al. [14]; Iqbal et al. [28]; Andrews and Carroll [33]).

103 In developing countries such as Ethiopia, land has been utilized intensively for any purposes  
104 regardless of its suitability, which has resulted in severe soil quality degradation. Such  
105 degradation has explained by poor soil properties and low agricultural production [14, 34-38].  
106 Practically, under the existing circumstances and economic conditions of farmers in developing  
107 countries such as Ethiopia there is a need to have inexpensive but environmentally sound  
108 integrated cropping system and land-use management approach to address soil quality related  
109 problems.

110 Increasing crop production in Ethiopia is likely to come from agricultural intensification and  
111 diversification through irrigation and other improved agronomic practices. Understanding  
112 impacts of different cropping and land-use practices on soil properties in general and soil OC and  
113 TN stock in particular is crucial for designing sustainable soil management practices. Scientific

114 information on site-specific soil properties is a basic tool for proper soil management in order to  
115 provide sustainable soil functions at present and in the future [2, 4, 14, 25]. Site-specific data on  
116 soil properties could also support to deal with spatial variability of soil nutrients and physical  
117 indicators and their influencing factors. Such information is important to formulate appropriate  
118 sustainable cropping systems and land-use type strategies [6, 12, 14, 19].

119 The sustainability of crop and soil management practices to improve or maintain soil quality  
120 depends on understanding how soils respond to different site-specific cropping and land-use  
121 practices. Soil properties as indicators of soil functions and soil quality degradation status are  
122 suggested for understanding the sustainability of soil resources [2, 14, 39, 40]. There are many  
123 reports that generalized soil properties and soil nutrient stocks variability among different land-  
124 use types such as cultivated, grazing, grass and forest land (e.g., Trivedi et al. [14]; Chemedo et al.  
125 [15]; Wang et al. [19]; Fikadu et al. [24]; Lemenih and Hanna [41]; Batjes [42]; Yimer et al.  
126 [43]). However, there have been limited studies about the impacts of site-specific long-term  
127 irrigated and non-irrigated cropping and land-use systems on soil properties and soil nutrient  
128 stocks under smallholder farmers' conditions in developing countries.

129 As most agricultural practices are site-specific the same management strategy cannot be said  
130 using the existing literature for the conditions of smallholder farmers in northern Ethiopia. Thus,  
131 it necessitates knowing the extent of soil quality degradation in terms of soil physical and  
132 chemical properties and nutrient stocks under different irrigation and rain-fed cropping and other  
133 land-use systems. There is also insufficient information about which soil properties (indicators)  
134 to be monitored over time with regard to the effects of cropping systems and other land-use  
135 practices in the study area conditions [5, 12, 19, 38]. This study was thus hypothesized that there  
136 is significant variability in soil properties and soil OC and TN stocks across the different long-  
137 term irrigated and non-irrigated adjacent cropping and land-use systems. The objectives of this  
138 research were to: (i) examine variation in soil properties under long-term irrigated and non-  
139 irrigated adjacent cropping and land-use systems (CLUS); (ii) evaluate soil organic carbon and  
140 total nitrogen stocks across the different CLUS; and (iii) examine soil properties that explain  
141 better for soil quality variability across the different CLUS in the conditions of Dura sub-  
142 catchment, northern Ethiopia.

143

## 144 **Materials and Methods**

## 145 **2.1 Study area**

146 This research was carried-out from February 2015 to June 2015 in Dura sub-catchment of Tigray  
147 region, northern Ethiopia (Fig 1). The study catchment area covers about 5000 ha and area of its  
148 sub-catchment is 1240 ha. Altitude of the sub-catchment ranges between 2050 and 2650 m above  
149 sea level [44]. In the study sub-catchment, mean annual temperature of 22°C and rainfall of 700  
150 mm were reported using 35 years of meteorological data. The study sub-catchment receives  
151 normal rainfall during June to early September which is unimodal (Meteorology Agency-  
152 Mekelle branch). Crop and livestock mixed-farming is commonly practiced. However, crop  
153 production is the dominant farming system for farmers' livelihood. Arable land is dominated  
154 over the other land-use types in the study catchment.

155 In Dura sub-catchment, both rain-fed and irrigation agriculture have been practiced for more  
156 than 2 decades. But rain-fed agriculture which is the oldest practice dominated in area coverage.  
157 About 100 ha farmland has been irrigated since 1996 in Dura sub-catchment. Afforested area,  
158 pasture, scattered woody trees, bushes and shrub lands were also found in the study sub-  
159 catchment. The dominant soils in the study sub-catchment includes: Eutric Cambisols on the  
160 steep slope, Chromic Cambisols on the middle to steep slopes and Chromic Vertisols on the flat  
161 areas [45]. This study sub-catchment was selected as it represents the mid-highland agro-ecology  
162 conditions with practices of long-term irrigated and non-irrigated adjacent fields under  
163 smallholder farmers in northern Ethiopia.

164 **Insert Figure 1 here**

## 165 **2.2 Identification of long-term irrigated and non-irrigated cropping and land-use systems**

166 Reconnaissance surveys coupled with formal and informal group discussions with farmers and  
167 development agents (DAs) were used to identify the different irrigated and non-irrigated  
168 cropping and land-use systems in Dura sub-catchment, northern Ethiopia. During the field  
169 surveys in February and March 2015 the researcher together with the DAs visited the study  
170 catchment to get an overall impression about the irrigation command area, adjacent rain-fed  
171 cropping and land-use systems. The purpose of the reconnaissance survey was to characterize  
172 the fields' historical cropping system, soil management, agronomic practices and field features.  
173 During the survey, participatory tools such as field observation, transect-walks and group  
174 discussion were employed. The transect-walks were done twice, that is, from the east to the  
175 west and also from the north to south direction of the study sub-catchment in order to observe

176 different cropping and land-use systems. This was done by the team composed of the  
177 researcher, three (3) DAs and randomly selected 10 farmers from the study sub-catchment.

178 Three group discussions sessions were held in order to reach consensus among the  
179 participants about the descriptions of the irrigated and non-irrigated fields that were selected.  
180 On the basis of the farmers' final consensus nine (9) dominant cropping and land-use systems  
181 (fields) were identified (Table 1), and geo-referenced and described their topographic features  
182 (Table 2). Such fields were selected because the site and crop specific management practices  
183 perhaps affect the sustainability of natural resources, crop productivity and soil fertility  
184 utilization in the catchment. The selected fields were located on Chromic Vertisols adjacent to  
185 each other at a distance that ranges between 50 and 150 m.

186 **Insert Table 1 here**

187 From the total nine (9) fields identified, four (4) were from irrigated fields, two (2) from rain-  
188 fed cropping system, and three (3) from other land-use systems. The cropping and land-use  
189 systems (fields) selected were: (i) Tef (*Eragrostic tef* (Zucc) Trot) mono-cropping (TM), (ii)  
190 Maize (*Zea mays L.*) mono-cropping (MM), (iii) Cauliflower (*Brassica oleracea* var. botrytis)  
191 with maize intercropping (IC1), (iv) Red beet (*Beta Vulgaris*) with maize intercropping (IC2),  
192 (v) Cauliflower - tef - maize rotation (R1), (vi) Onion (*Allium cepa L.*) - maize - onion rotation  
193 (R2), (vii) Treated gully (TG), (viii) Untreated gully (UTG), and (ix) Natural forest land-use  
194 system (NF) (Table 1). The first two (TM and MM) were selected from the rain-fed fields  
195 adjacent to the irrigation command area, whereas IC1, IC2, R1 and R2 were selected from the  
196 irrigated crop fields. TG and UTG were also found within the irrigation command area. An  
197 adjacent natural forest land-use system (NF) was used as a reference while compared with the  
198 impact of irrigation and non-irrigation cropping and land-use systems on soil properties, and  
199 carbon and nitrogen stocks.

200

201 **Insert Table 2 here**

### 202 **2.3 Sample designing, soil sampling and analysis**

203 The targeted fields (population) were all the cropping and land-use systems (CLUS) practiced  
204 in Dura sub-catchment. Farmers were selected nine CLUS that dominantly available in the sub-



205 catchment. The soil samples were taken from the nine irrigated and non-irrigated CLUS which  
206 were selected from the sub-catchment. Composite soil samples were collected from the  
207 selected sampling points in each CLUS using judgmental sampling on the basis of reliable  
208 historical and physical knowledge of experts and local farmers (Table 1). Soil samples were  
209 collected in May 2015. Three sampling units replicated in the nine CLUS were identified by  
210 experts' judgment based on field homogeneity. Identification of the sampling units using  
211 expert knowledge is very efficient as it is quick and easy to select the sampling units.

212 Considering the costs of soil analysis and its statistical representativeness a total of 27  
213 composite soil samples from three sampling units (9 CLUS x 3 sampling units) were collected.  
214 The soil sampling unit plot area was 48 m<sup>2</sup> (6 m x 8 m). The soil sampling plots land features  
215 are described in Table 2. In each sampling unit plot 10 pairs of randomly selected coordinate  
216 points were identified. From the 10 geo-referenced points in each sampling plot, three sampling  
217 points were selected using simple random sampling technique whereby the composite soil  
218 sample from each plot was collected.

219 The soil samples were taken from each sampling point at 0-20 cm soil depth. This sampling  
220 depth is where most soil changes are occurred due to long-term cropping systems, land-use  
221 types, and soil and water management practices including irrigation agriculture. Three soil  
222 samples were collected from each sampling unit in a plot and pooled (composited) into a bucket  
223 and mixed thoroughly to form a single homogenized sample. A sub-sample of 500 g soil that  
224 represented the pooled sample in the bucket was taken from each sampling unit plot, and air  
225 dried and sieved through 2 mm mesh sieves. In addition, three undisturbed soil samples were  
226 collected from each irrigated and non-irrigated field sampling unit plots at 0-20 cm soil depth  
227 using 5.0 cm long by 5.0 cm diameter cylindrical metal core sampler to determine soil dry bulk  
228 density.

229 The analysis of the soil samples was carried-out following the standard laboratory procedures  
230 in JIJE Analytical Testing Service Laboratory in Addis Ababa, Ethiopia. Soil texture was  
231 determined using the Bouyoucos hydrometer method [46] and soil dry bulk density (DBD) by  
232 the core method [47]. Total porosity was calculated from the DBD and assumed average particle  
233 density (PD) of 2.65 Mg m<sup>-3</sup> as  $(1-DBD/PD) \times 100$  [48]. The depth of A-horizon was directly  
234 measured as an average of the three pits opened (0.60 m depth) in each sampling unit plot.

235 Soil pH was determined in 1:2.5 soil to water ratio using pH meter combined glass electrode  
236 [49], electrical conductivity (EC) in 1:2.5 soil to water ratio using conductivity meter [50], soil



237 organic carbon (OC) by the Walkley-Black method [51], available phosphorus (Pav) by Olsen  
238 method [52], and total nitrogen (TN) by Kjeldhal digestion method followed by distillation and  
239 titration [53]. Cation exchange capacity (CEC) was determined by ammonium acetate extraction  
240 buffered at pH 7 using flame photometer [54].

241 Exchangeable bases ( $\text{Ca}^{2+}$ ,  $\text{Mg}^{2+}$ ,  $\text{K}^+$  and  $\text{Na}^+$ ) were analyzed after extracted in a 1:10  
242 soil/solution ratio using 1M ammonium acetate at pH 7.0. Readings for  $\text{Ca}^{2+}$  and  $\text{Mg}^{2+}$  in the  
243 extracts were analyzed using atomic absorption spectrophotometer whereas  $\text{Na}^+$  and  $\text{K}^+$  were  
244 determined by flame photometry [55].

245

## 246 **2.4 Derived other soil parameters**

247 Soil structural stability index is estimated [56, 57] as:

$$248 \quad SSSI = \frac{1.724SOC(\%)}{clay(\%) + silt(\%)} \times 100 \quad (1)$$

249

250 Where, SSSI (%) is soil structural stability index, SOC is soil organic carbon, and clay + silt  
251 is combined clay and silt content.  $SSSI < 5\%$  indicates structurally degraded soil;  $5\% < SSSI <$   
252  $7\%$  indicates high risk of soil structural degradation;  $7\% < SSSI < 9\%$  indicates low risk of soil  
253 structural degradation; and  $SSSI > 9\%$  indicates sufficient SOC to maintain the structural  
254 stability. A higher the SSI value, a better would be in maintaining soil structural degradation.

255 Base saturation percentage was calculated by divided the sum of base forming cations ( $\text{Ca}^{2+}$ ,  
256  $\text{Mg}^{2+}$ ,  $\text{K}^+$  and  $\text{Na}^+$ ) by CEC and then multiplied by 100%. Exchangeable sodium percentage  
257 (ESP) was calculated by divided exchangeable  $\text{Na}^+$  by CEC. The ESP threshold of 15% was used  
258 to classify sodium hazard, that is, sodic soils are those with ESP of more than 15%. Sodium  
259 adsorption ratio (SAR) was calculated [58-60] as:

$$260 \quad SAR = \frac{Na^+}{\sqrt{\frac{(Ca^{++} + Mg^{++})}{2}}} \quad (2)$$

261

262 Where, SAR is sodium adsorption ratio in  $(\text{cmol kg}^{-1})^{0.5}$ ; and  $\text{Na}^+$ ,  $\text{Mg}^{2+}$  and  $\text{Ca}^{2+}$  are  
263 exchangeable sodium, magnesium and calcium, respectively, in  $\text{cmol}_c \text{ kg}^{-1}$ .  $SAR < 12$  indicate  
264 non sodicity and values  $>12$  indicate sodic soils [58].

265 The relationship between soil OC and TN as represented by the ratio of OC to TN was  
266 derived as an indicator of soil quality status. The OC: TN is a sensitive indicator of soil quality  
267 when assesses soil carbon and nitrogen nutrient balance. It is used as a sign of soil nitrogen  
268 mineralization capacity [61, 62]. A high OC: TN indicates the slowdown decomposition rate of  
269 organic matter by limiting soil microbial activity. On the other hand, low ratio of OC: TN could  
270 show the accelerated process of microbial decomposition on organic matter and nitrogen, in  
271 which this is not conducive for carbon sequestration [61-63].

272 Soil OC and TN stocks ( $\text{Mg ha}^{-1}$ ) were calculated using the model developed by Ellert and  
273 Bettany [64] as:

$$274 \text{ OC (or TN) Stock} = \text{Conc} \times \rho_b \times T \times 10000 \text{ m}^2 \text{ ha}^{-1} \times 0.001 \text{ Mg kg}^{-1} \quad (3)$$

275 Where: *OC (or TN) Stock* is soil organic carbon or total nitrogen stock ( $\text{Mg ha}^{-1}$ ), *Conc* is soil  
276 organic carbon or total nitrogen concentration ( $\text{kg Mg}^{-1}$ ),  $\rho_b$  is dry bulk density ( $\text{Mg m}^{-3}$ ) and *T* is  
277 thickness of soil layer (m). Natural forest (less disturbed system) was used as a reference while  
278 assessed the amount of soil OC and TN stock reduction due to the effects of each CLUS. Thus,  
279 the difference between NF and any CLUS divided by NF and multiplied by 100% was used to  
280 show the reduction of OC and TN from the soil stocks in the different CLUS. Reduction in soil  
281 OC and TN implies there is contribution towards increasing the global green house gases that  
282 emitted to the atmosphere.

283

## 284 **2.5 Data analysis**

285 Data were analyzed using statistical software package of SPSS 20.0, SPSS Inc. International  
286 Business Machines Company, Chicago, USA. One-way analysis of variance was carried out to  
287 test the mean differences of the soil properties among the nine cropping and land-use systems.  
288 Data were tested for the assumption of normal distribution. Means were separated using Least  
289 Significant Differences at probability level ( $P \leq 0.05$ ). Data were also subjected to descriptive,  
290 correlation ( $r$ ) and factor analysis.

291 Correlations among the soil properties were checked by Pearson product moment correlation  
292 test (two-tailed) at  $P \leq 0.05$  in order to assess the effect of multi-collinearity. The principal  
293 component analysis (PCA) was also used to extract factor components and reduce variable  
294 redundancy. The PCA was thus used to examine the relationship among the 22 soil properties by

295 statistically grouped into five principal components (PCs) using the Varimax rotation procedure.  
296 The five PCs with eigenvalues  $> 1$  that explained at least 5% of the variation of the soil  
297 properties response to the cropping and land-use systems were considered. Varimax rotation with  
298 Kaiser Normalization resulted in a factor pattern that highly loads into one factor [65]. If the  
299 highly weighted variables within PC correlated at the correlation ( $r$ ) value  $< 0.60$ , all variables  
300 were retained in the PC. Among the well-correlated variables ( $r \geq 0.60$ ) within PC, a variable  
301 with the highest partial correlation coefficient and factor loading was retained in the component  
302 factor. Note that only variables with factor loadings  $> 0.7$  were retained in the PC. If the loading  
303 coefficient of a variable was  $> 0.7$  in more than one component, it was suggested to select from  
304 the component holding with the highest coefficient for that variable [66]. Communalities that  
305 estimate the portion of variance of each soil parameter in the component factor was also  
306 considered while selected a variable to be retained in the PC. A higher communality for a soil  
307 parameter indicates a higher proportion of the variance is explained the component factor by the  
308 variable. Less importance should be ascribed to soil parameters with low communalities when  
309 interpreting the PC factors [65].

310

## 311 **2.6. Ethics approval**

312 Ethical approval was obtained from the Research and Community Services Directorate Director  
313 Research Ethics Review Committee of Aksum University, Ethiopia to conduct this study. Full  
314 right was given to the study participants to refuse and withdraw from participation at any time.  
315 Confidentiality of respondents was preserved by the researchers during data collection of soil  
316 samples and soil and crop management history. It was also noted that the research has no any  
317 activities that directly related to human being as it is directly related to the physical environment.

318

319

## 320 **3. Results ad Discussion**

### 321 **3.1 Effect on soil physical properties**

322 The soil physical properties significantly varied among most cropping and land-use systems  
323 (CLUS) in Dura sub-catchment, northern Ethiopia. There were significant differences in clay,  
324 silt, sand, bulk density, porosity, soil structural stability index, and A-horizon among most of the  
325 CLUS (Table 3). The soil clay contents of the CLUS varied significantly between 26 to 74%,  
326 with the lowest and the highest values observed from TM and R2, respectively. This could  
327 influence the other textural classes and physical and chemical soil properties.

328 The lowest silt (22.7%) and sand (3.7%) contents were observed from R2 whereas the highest  
329 silt (43%) from NF and sand (39.0%) from TM were observed. The highest sand content in the  
330 TM may be associated with repeated cultivation using inorganic fertilizer for long-time in which  
331 such practices aggravate erosion that erode fine soil particles and leaves coarser particles (Brady  
332 and Weil, 2002). The mean clay (44.2%), silt (33.2%) and sand (22.6%) contents of all the  
333 CLUS indicated that the sub-catchment soil has dominated by clay followed by silt texture soil.  
334 Fields with higher clay content such as R2 are considered by local farmers as difficult for  
335 workability and so susceptible to the problem of water logging in which this is in agreement with  
336 the reports reported by Barrios and Trejo [67]; Mairura et al. [68] and Tesfahunegn et al. [69].

337 On the other hand, there were non-significant differences in soil sand contents among some  
338 of the CLUS, e.g., between TM and UTG, IC1 and IC2, R1 and TG (Table 3). This could be  
339 attributed to the fact that sand texture is soil property that does influence little by some of the  
340 CLUS and their activities and so by erosion-deposition processes. The present finding on soil  
341 sand content is consistent with Shepherd et al. [70] who reported that there is no significant  
342 effect of land-use systems on soil particle size distribution. However, such reports contradicted  
343 with that of Kauffmann et al. [71]; Voundi Nkana and Tonye [72] and Agoumé and Birang [73]  
344 who reported that continuous cropping and intensive land-use systems have significantly affected  
345 soil particle size distribution. Such discrepancy of results on soil particles could be attributed to  
346 the duration of the cropping system, variability of management practices and weather conditions,  
347 and effects of variation in topography.

### 348 **Insert Table 3 here**

349

350 The lowest dry bulk density (DBD) was recorded from NF (1.19 Mg m<sup>-3</sup>) followed by TG  
351 (1.32 Mg m<sup>-3</sup>) and MM (1.39 Mg m<sup>-3</sup>). Conversely, the highest bulk density was found from  
352 UTG (1.77 Mg m<sup>-3</sup>) followed by TM (1.59 Mg m<sup>-3</sup>) and IC2 (1.50 Mg m<sup>-3</sup>). However, there were  
353 non-significant differences in DBD between IC1 and IC2, and R1 and R2. Generally, DBD was  
354 found to be higher in mono-cropping than intercropping and rotation cropping systems; and in  
355 intercropping than crop rotation fields (Table 3). The exceptional lower DBD from MM could be  
356 associated with the effect of manure and compost whereby farmers regularly applied to maize  
357 fields in each cropping season. The DBD of NF, TG and MM were found within the ideal critical  
358 levels (1.00-1.40 Mg m<sup>-3</sup>) as described as an ideal soil condition for plant root growth and water  
359 holding capacity by Arshad et al.[74]. However, the other cropping and land-use systems

360 considered in this study showed DBD values higher than the critical level in which this implies  
361 the need for adopting appropriate practices that improve soil bulk density.

362 Total porosity, SSSI and A-horizon values were significantly varied among the CLUS, with  
363 the highest of these parameters recorded from NF and the lowest from UTG (Table 3). The trend  
364 of these parameters is similar to that of DBD but in the opposite direction. The variation in total  
365 porosity, SSSI and A-horizon among the different CLUS could be attributed to the differences in  
366 soil organic matter (SOM) contents. In fact, land-use systems such as NF, TG and MM which  
367 have received higher OM sources can improve the quality of soil properties. Soils with a good  
368 physical quality have a stable structure which resist for the effects of erosion [73, 74]. The risk of  
369 soil structural degradation associated with SOC depletion was found to be higher in UTG  
370 followed by TM even though R1, R2, IC1, IC2 and MM are also showed structurally degraded  
371 soil with SSSI < 5%.

372 Consistent with the present finding, substantial reports have shown that degraded soil that  
373 receives higher SOM can improve soil porosity, soil structure and depth of A-horizon. Improving  
374 such soil attributes would enhance soil water-holding capacity, decreases runoff and soil losses  
375 and eventually increases agricultural production (e.g., Agoumé and Birang [73]; Arshad et al.  
376 [74]; Sojka and Upchurch [75]; Evanylo and McGuinn [76]; Sally and Karle [77]; Moghadam et  
377 al. [78]). Conversely, cultivated fields treated with mineral fertilizer consecutively for many  
378 years such as TM and irrigation fields (e.g., IC1, IC2) showed poor soil physical properties. The  
379 implication of this study result is that cropping systems treated using only mineral fertilizer for a  
380 long-term deteriorates soil physical properties. However, the trends of rates of mineral fertilizer  
381 have been increased from time to time in Ethiopia. The present result of structural physical  
382 degraded soils could be associated with the continuous application of chemical fertilizer for  
383 more than 2 decades which in line with the reports from Moghadam et al. [78] and Ayoola [79]  
384 who reported a negative effect of continuous usage of mineral fertilizer on the soil system.

385

### 386 **3.2 Effect on soil chemical properties**

#### 387 **3.2.1 Effects on soil pH and electrical conductivity**

388 There were statistically significant differences in soil chemical properties among most  
389 cropping and land-use systems (CLUS) in the study sub-catchment (Table 4). The soil pH varied  
390 significantly from 6.94 in TM to 8.50 in R1. The higher pH in R1 could be associated with the  
391 effects of long-term irrigation and soil management practices. There was also non-significant

392 differences in soil pH among some of the CLUS (e.g., between MM and NF; and among IC1,  
393 IC2, and TG). The mean soil pH (7.68) of all the CLUS indicates that the study catchment soil is  
394 categorized as moderately alkaline in reference to the classification for African soils reported by  
395 Landon [80]. Generally, the CLUS in the catchment showed soil pH values within the critical  
396 levels (6.5-8.5) reported in literature (e.g., Sanchez et al. [81]; Tesfahunegn et al. [82], which  
397 indicates that soil pH is not a key problem to monitor effects of the different cropping and land-  
398 use systems on soil quality indicators.

399 The highest soil EC was recorded from irrigated fields of IC2 (0.510 ds m<sup>-1</sup>) followed by R2  
400 (0.390 ds m<sup>-1</sup>) whereas the lowest was found from rain-fed field of TM (0.057 ds m<sup>-1</sup>). However,  
401 there were non-significant differences in EC among many of the CLUS (e.g., MM, IC1, R1, R2,  
402 TG, UTG and NF) (Table 4). According to Landon [80], soil EC determined from the different  
403 CLUS is categorized as non-saline even though EC was found to be higher in the irrigation fields  
404 as compared to the other CLUS. The most likely reason for having low EC even in the irrigated  
405 fields could be attributed to the acceptable irrigation water quality, and irrigation method  
406 (furrow), and heavy rainfall during the summer season (June to early September) which may  
407 contribute for timely leaching of salts from the root zone. It is thus suggested to assess the  
408 salinity status of sub-surface soil layers of the irrigated fields in order to understand the extent of  
409 salt leached towards the lower soil horizons.

410 **Insert Table 4 here**

411

### 412 **3.2.2 Effects on cation exchange capacity and base forming cations**

413 The highest CEC (50.3 cmol<sub>c</sub> kg<sup>-1</sup>) and Ex K (1.43 cmol<sub>c</sub> kg<sup>-1</sup>) were found from TG followed by  
414 NF (CEC = 49.8 cmol<sub>c</sub> kg<sup>-1</sup>, Ex K = 1.39 cmol<sub>c</sub> kg<sup>-1</sup>) whereas the lowest CEC (11.4 cmol<sub>c</sub> kg<sup>-1</sup>)  
415 and Ex K (0.204 cmol<sub>c</sub> kg<sup>-1</sup>) were recorded from UTG. The significantly higher Ex Ca (25.5  
416 cmol<sub>c</sub> kg<sup>-1</sup>) and Ex Mg (15.1 cmol<sub>c</sub> kg<sup>-1</sup>) were recorded from NF whereas the lowest Ex Ca (4.5  
417 cmol<sub>c</sub> kg<sup>-1</sup>) and Ex Mg (1.3 cmol<sub>c</sub> kg<sup>-1</sup>) were observed from UTG (Table 4). The CEC, Ex Ca, Ex  
418 Mg, and Ex K recorded from MM were significantly higher than that of TM, IC1, IC2, R1, R2,  
419 and UTG. There were non-significant differences in CEC, exchangeable Ca, Mg, and K between  
420 the intercropping systems (IC1 and IC2), and also between crop rotation practices (R1 and R2) in  
421 the study sub-catchment. This indicates that crops used for intercropping and rotations have  
422 similar effect on CEC and soil exchangeable bases. However, CEC and those exchangeable  
423 bases recorded from irrigated fields with crop rotations were found to be higher than that of



424 intercropping systems and rain-fed TM. Similarly, values of these soil properties were  
425 significantly higher in irrigated intercropping than rain-fed TM. Generally, CEC and  
426 exchangeable bases observed from NF and TG were categorized as very high; that of MM, IC1,  
427 IC2, R1 and R2 as high; from TM as medium; and UTG as a low rate as compared to the rates  
428 reported for African soils by Landon [80].

429 The highest Ex Na was found from IC2 (0.682  $\text{cmol}_c \text{kg}^{-1}$ ) followed by IC2 (0.667  $\text{cmol}_c \text{kg}^{-1}$ )  
430 <sup>1</sup>). The lowest Ex Na was recorded from NF (0.030  $\text{cmol}_c \text{kg}^{-1}$ ) and TM (0.040  $\text{cmol}_c \text{kg}^{-1}$ ). The  
431 Ex Na recorded from TG was significantly higher than that of NF, TM, MM and UTG (Table 4),  
432 in which this could be attributed to the effects of long-term irrigation water drained to TG as it is  
433 located within the irrigation fields. According to Landon (1991), Ex Na observed from IC1, IC2,  
434 R1, R2 and TG were rated as medium; MM and UTG as low; and NF and TM as very low.  
435 However, the Ex Na from the irrigation fields was found to be near to the cut-off point for  
436 medium rate (0.7  $\text{cmol}_c \text{kg}^{-1}$ ) which is regarded as potentially sodic, indicating that necessary soil  
437 and crop management practices should be taken to reduce or maintain Ex Na of the soil. In  
438 addition, the highest SBFC and BSP were found from NF and TG whereas the lowest was from  
439 UTG followed by TM (Table 4). According to the report by Landon [80] the BSP from NF and  
440 TG was rated as very high and that of UTG was rated as medium. According to the same author,  
441 the BSP of the remaining CLUS were categorized in the high rate. The highest ESP and SAR  
442 were recorded from IC1 followed by R2 and the lowest was from NF followed by TM (Table 4).  
443 However, all the CLUS showed  $\text{ESP} < 2$ , which is classified as low or non-sodic soils as  
444 reported in the rate for African soils by Landon (1991). Since the SAR is  $< 12$  which is the cut-  
445 off point [58], the soil of the CLUS is categorized as non sodicity.

446

### 447 **3.3 Effects on soil nutrients**

448 The highest and statistically significant Pav was recorded from NF (23.9  $\text{mg kg}^{-1}$ ) followed by  
449 TG (19.4  $\text{mg kg}^{-1}$ ). However, the lowest Pav was found from UTG (1.4  $\text{mg kg}^{-1}$ ) followed by  
450 TM (2.0  $\text{mg kg}^{-1}$ ). The Pav contents among the intercropping and crop rotation practices under  
451 irrigation system were non-significantly differed. But Pav from MM was found to be  
452 significantly higher than the other cropping systems (Table 4). Soil Pav of NF, TG, and MM  
453 were rated as very high, high and medium, respectively, and the rest CLUS rated as very low in  
454 Pav as compared to the rates reported by Landon [80]). Soil management attention should thus  
455 be given to CLUS with very low soil Pav so that to improve Pav using appropriate practices and



456 also maintain the Pav of potential land-use systems. Generally, this study result of Pav is  
457 consistent with previous reports elsewhere (e.g. Lemenin and Hanna [41]; Solomon et al. [83];  
458 Nweke and Nnabude [84]; Flynn [85]) who stated that soil Pav variability has related to land-use  
459 type and soil management practices. For example, losses of Pav is higher in continuously  
460 cropped land as compared to forest land and other well managed land-use systems due to its  
461 fixation, removed with crop harvest, poor residual management and erosion processes ([84, 85].

462 The highest and statistically significant soil organic carbon (OC) was found from NF (4.98%)  
463 followed by TG (3.120%) while the lowest OC was from UTG (0.413%) followed by TM  
464 (0.643%). The optimal OC, i.e., between 3% < OC < 5 % as proposed by Craul [86], which  
465 indicates low risk of soil structural degradation is consistent with the values of NF and TG. The  
466 soil OC recorded from MM (1.45%) was significantly higher than that of intercropping (mean  
467 OC 1.31%) and crop rotation (mean OC 1.11%). The reason could be due to continuous  
468 application of manure or compost to MM than in the other arable fields and its residual effects on  
469 the soil system. The soil OC was higher in the intercropping fields than in the crop rotation which  
470 could be associated with the effect of legume crop (*Guizotia abyssinica* L.) intercropped with tef  
471 during the rain-fed crop season. Long-term studies on the benefit of manures, intercropping, and  
472 crop rotation have consistently reported for maintaining and increasing OC inputs into the soil  
473 and thereby impacts on soil properties [4, 14, 28]. However, even with intercropping, crop  
474 rotation and manure additions, continuous cropping and improperly intercropped and crop  
475 rotated fields resulted in a decline in OC. The rate and magnitude of the decline is affected by  
476 tillage, cropping system, management practices, and climate and soil conditions [14, 87].

477 According to Kay and Angers [88], irrespective of soil type and climatic condition if SOC  
478 contents are below 1% (e.g., TM, UTG), it may not be possible to obtain potential yields.  
479 Because SOC can impact on other physical, chemical and biological soil properties. In this study,  
480 SOC of TM and UTG showed very low; NF followed by TG showed very high and the SOC of  
481 the remaining CLUS (Table 4) are within the low rate as reported for African soils by Landon  
482 [80]. In agreement to the present finding other researchers elsewhere have reported that  
483 continuous cultivation depleted SOC and reduced soil quality compared to native vegetation  
484 (NF), regardless of the cropping system practiced (e.g., Reeves [87]; Bowman et al. [89]; Bremer  
485 et al. [90]).

486 The highest soil total nitrogen (TN) was found due to NF (0.541%) followed by TG  
487 (0.257%). The lowest TN was recorded from UTG (0.030%) followed by TM (0.067%). The soil

488 TN from MM was significantly higher than that of IC1, IC2, R1 and R2 (Table 4), which could  
489 be attributed to the higher amount of manure applied to MM fields during each cropping season.  
490 TN from NF and TG rated as very high and high, respectively. The TN from the other CLUS  
491 rated as low except MM which is rated as medium and UTG as very low [80]. The present  
492 finding on OC and TN is consistent with other reports which have reported that SOC and TN  
493 content are not only affected by climate and terrain, but also by land-use and soil management  
494 practices. For example, agricultural intensification and repeated cultivation have resulted in a  
495 serious decrease in SOC and TN as compared to natural vegetation such as NF. The fact is that  
496 cultivation enhances decomposition of soil organic carbon, and physical removal of biomass as  
497 straw and grain harvest reduces its availability (e.g., Zhang et al. [61]; Wu et al. [63]; Nweke and  
498 Nnabude [84]; Johnson and Curtis [91]).

499

### 500 **3.4 Effects on OC to TN ratio**

501 The highest OC: TN was recorded from TG (13.7) followed by NF (12.9) and UTG (12.2) (Table  
502 4), which could be associated with low oxidation (decomposition) rate of organic sources as  
503 compared to the inputs available in the study sub-catchment. Meaning, there were no soil and  
504 agronomic practices that enhanced decomposition of organic sources in these selected land-use  
505 systems. In addition, the soil in TG was water saturated almost for more than 8 months of the  
506 year, in which this could be slow down the decomposition of organic matter by limiting soil  
507 microbial activity [61, 63]. Similarly, long-term effects of irrigation practices can reduce  
508 microbial activity and thereby reduces organic matter decomposition which could be the reason  
509 for OC: TN to be slightly higher than 10 in the irrigation fields such as IC1, IC2, R1 and R2. The  
510 OC: TN of MM (11.4) was found to be higher than that of the fields under irrigation cropping  
511 system. The reason could be associated with the application of higher manure to MM field  
512 during the cropping season. It is also a fact that manure decomposes slowly during the irrigation  
513 cropping season. The lowest OC: TN was reported from TM (9.6), indicating that there is a  
514 higher organic matter mineralization. TM was the only CLUS which showed OC: TN below 10  
515 (Table 4), indicating a balance in soil carbon and nitrogen nutrients [61, 92].

516 An optimum temperature and moisture conditions might be enhanced microbial activities to  
517 decompose organic sources in the fields such as TM [63]. However, the selected fields did  
518 receive little moisture from rainfall for about 8 months. The conventional tillage practice  
519 (cultivation) used in TM could also enhances organic sources to be decompose quickly [92, 93].

520 Tillage practice coupled with insufficient inputs of organic sources in the farming system of TM  
521 in a system that removes crop residue and absence of crop rotation resulted in a lower OC: TN  
522 [62, 94]. From agricultural production point of view literature showed that cropping and land-use  
523 systems with OC: TN < 10 is rated as good, 10.1-14 as medium and > 14 as poor soil systems  
524 [80]. However, such values are contrasted to the present pressures to reduce carbon emission to  
525 the atmosphere and sequestered carbon through maintaining higher soil OC: TN [62, 95, 96].  
526 Hence, CLUS such as TG and NF showed better or conducive conditions for carbon  
527 sequestration as organic matter decomposition is slow down by limiting microbial activity as  
528 compared to cropping systems which accelerate the decomposition of organic sources. The OC:  
529 TN determined from TG and NF is lower than that of apple orchard (OC: TN of 15.4) reported  
530 for northern China [62, 96, ]. However, the existing reports have not quantified the contribution  
531 of nitrogen deposition from the atmosphere to soil TN as this is the other factor that potentially  
532 affects the results of soil OC: TN of the different CLUS.

533

### 534 **3.5 Effect on soil organic carbon (OC) and total nitrogen (TN) stocks**

535 In the study sub-catchment, soil OC and TN stocks varied significantly among the majority of  
536 the cropping and land-use systems at 0-20 cm depth (Table 5). The highest stock of OC (113.6  
537 Mg C ha<sup>-1</sup>) and TN (12.2 Mg C ha<sup>-1</sup>) were reported from NF. The soil OC stock from NF was  
538 slightly lower than that of reported for tropical forests (122 Mg C ha<sup>-1</sup>) by Prentice et al. (2001)  
539 in which such differences could be attributed to variability in N-fixing trees, soil factor and  
540 climatic conditions. The lowest stocks of soil OC (3.5 Mg C ha<sup>-1</sup>) and TN (0.25 Mg C ha<sup>-1</sup>) were  
541 found from UTG (Table 5). The soil OC and TN stocks of TG were significantly higher than the  
542 other CLUS, except that of NF. In line with the present results, Lal [25] has reported that soil  
543 organic matter (OM) can be greatly enhanced when degraded soils and ecosystems are restored,  
544 or converted to a restorative land-use or replanted to perennial vegetation (e.g., TG); and  
545 depleted OM in agricultural soils that use conventional tillage (e.g., TM). This could be the  
546 reason for OC to be used as an important indicator of both soil productivity and climate change  
547 mitigation interventions [25, 38].

548 The soil OC and TN stocks estimated from MM were showed significantly higher than all the  
549 other CLUS, except that of NF and TG. This could be associated with the seasonal application  
550 of organic inputs on MM fields. The soil OC and TN stocked in the intercropped fields were  
551 higher than that of rotation and TM which might be associated with the relatively effectiveness

552 of the intercropping system for improving soil OC sequestration. Overall, such OC and TN stock  
553 variability is attributed to decrease in soil bulk density values significantly across the CLUS. The  
554 present results of OC and TN stocks variability across the CLUS is agreed to the previous reports  
555 of Bird et al. [97] and Saiz et al. [98] who have reported variability in soil stocks attributed to  
556 different factors across land-use and land management practices. For example, practices in NF  
557 and TG (Table 1) that reduce soil OM mineralization and erosion, and increase OM inputs to the  
558 soil could improve soil OC and TN stocks.

559 As compared to the reference land-use system (NF), soil OC stock due to UTG and TM was  
560 reduced by 97 and 91%, respectively. Similarly, TN stock was reduced due to UTG and TM by  
561 98 and 91%, respectively. The mean reduction of OC stocks by crop rotation, intercropping,  
562 MM, and TG as compared to the NF were found to be 85, 81, 75, and 57%, respectively. The  
563 mean TN stock reduced due to crop rotation, intercropping, MM, and TG as compared to NF was  
564 calculated as 88, 85, 78, and 70%, respectively. This study results thus indicated that the SOC  
565 and TN stocks are drastically reduced in most of the CLUS, with the highest reduction from  
566 UTG followed by TM. Losses of OC and TN from the soil system could increase the amount of  
567 carbon and nitrogen gasses in the atmosphere at global-scale [38, 99]. The TN stock reduction is  
568 slightly higher than the SOC stock across all the CLUS, indicating that understanding the reason  
569 for more soil nitrogen depletion should merit further investigation. Generally, the soil OC stock  
570 reduced in this study is reported higher than the previous reports from Africa (e.g., Amudson  
571 [99]) who reported that cultivation reduces the original OC content by up-to 30%. In the study  
572 catchment, such variability could be attributed to the duration and management practices of the  
573 CLUS as arable lands have been cultivated for more than 100 years. In addition, increasing soil  
574 OC stock is a major challenge in dry areas where vegetation growth is hampered by climatically  
575 harsh conditions such as low availability of water and nutrients, removal for fodder and  
576 fuelwood [38].

577

578 **Insert Table 5 here**

579

### 580 **3.6 Determinants of soil prosperities variability using PCA**

581 The bivariate correlation analysis among many soil properties determined from the CLUS  
582 correlated ( $r$ ) at  $r > 0.70$  which qualitatively described as moderate to extremely strong  
583 correlation (data not shown). Such values of  $r$  indicate that there are multicollinearity effects

584 among the soil properties. The effect of multicollinearity was handled using principal component  
585 analysis (PCA) that grouped soil properties into five principal components (PCs) (Table 6). The  
586 eigenvalue of PC1, PC2, PC3, PC4 and PC5 are 8.50, 6.48, 2.24, 1.61 and 1.13, respectively.  
587 The five PCs that received eigenvalues  $>1$  explain largely the variability of the soil properties  
588 among the CLUS [65]. The variances explained by PC1, PC2, PC3, PC4 and PC5 are 30.65,  
589 24.32, 17.29, 7.90 and 6.63, respectively. Such variance values are in line with the report of  
590 Brejda et al. [65] who stated that PCs that receive at least 5% variance explains the best  
591 variability of a factor component. The soil properties included in the first five PCs explain for  
592 86.8% of the soil quality variability among the CLUS. The communalities of the extracted five  
593 PCs explained by each soil property ranges from 74-96% (Table 6). A high communality  
594 variable shows that a high portion of variance was explained the variable and therefore, it gets a  
595 higher preference to a low communality [100].

596 The highly loading variables in PC1 were CEC and clay content (Table 6). Since the  
597 correlation coefficient between CEC and clay was 0.86 which is higher than the cut-off point  
598 (0.60), communality was considered to select the parameter to be retained in PC1. As a result,  
599 CEC was retained in PC1 because the loading (0.87) and communality (0.95) of CEC were  
600 higher than that of clay. The first PC is thus termed as '*cation exchange capacity, CEC factor*'.  
601 Similarly, the highly loading variables under PC2 were SOC, TN and soil structural stability  
602 index (SSSI). However, the partial correlation analysis results indicated strong correlations ( $r >$   
603 0.80) among these variables. Considering the higher partial correlation coefficient, loading value  
604 and communality, SOC was retained in PC2. The content of SOC influences directly the value of  
605 the other highly loading variables (TN and SSSI) [82, 101, 102]. The implication these reports is  
606 that the contribution of TN and SSSI to PC2 is explained using SOC. As a result, PC2 is termed  
607 as the '*organic matter factor*'. The highly loaded variables in PC3 included dry soil bulk density  
608 (DBD), porosity and A-horizon depth (A\_h). The partial correlation analysis between DBD and  
609 porosity showed at  $r = 0.85$ . Since the loading value and communality of DBD was slightly  
610 higher than that of porosity, DBD was retained in PC3. A-horizon depth was also retained in PC3  
611 as the correlation coefficient with the other high loading variables showed less than the cut-off  
612 point ( $< 0.60$ ). Thus, PC3 is termed as '*soil physical property factor*'. The highly loaded variable  
613 in PC4 included Ex Na, ESP and SAR. The partial correlation values among these variables  
614 showed strong correlation ( $r > 0.88$ ). Considering the higher correlation coefficient, loading  
615 weight and communality values, Ex Na was retained in PC4 and the rest variables were excluded

616 from PC4. As a result, PC4 was termed as the ‘*sodicity factor*’. Likewise, the highly loaded  
617 variables in PC5 are TN and Pav (Table 6). Since the correlation between TN and Pav is below  
618 0.6, both variables were retained in PC5. The loading coefficient of TN in PC5 (0.86) is higher  
619 than in PC2 (0.81) which is another reason to retain TN in PC5. Nitrogen and phosphorus are  
620 commonly reported as the most crop limiting soil nutrients in developing countries. So,  
621 considering these parameters in PC5 is important while assessing soil degradation using soil  
622 properties as an indicator among the CLUS. Thus, PC5 is termed as the ‘*soil macro-nutrient*  
623 *factor*’.

624 The seven PCA chosen final soil properties that better explain (determinant) of soil quality  
625 variability among the CLUS were CEC, SOC, DBD, A<sub>h</sub>, Ex Na, TN, and Pav. Future  
626 assessment and monitoring of the effects of CLUS on soil quality is suggested to depend on these  
627 seven soil properties which are sensitive to disturbances related to land-use and management  
628 practices. This can reduce wastage of resources (e.g., cost, time, labor) while analyzing the entire  
629 datasets and also gives rapid response for effective assessment and decision-making. Generally,  
630 among the seven PCA chosen soil properties of this study, five (CEC, SOC, TN, phosphorus,  
631 DBD) parameters were similarly selected by Tesfahunegn et al. [82] who has reported from  
632 exclusively rain-fed land-use and soil management practices in northern Ethiopia. The choice of  
633 SOC in the PC factor as determinant soil property for soil quality variability across the CLUS is  
634 consistent with other reports (e.g., Larson Pierce [103]; Shukla et al. [104]) who have reported  
635 that soil organic matter (SOM) is among the most powerful soil properties to influence many soil  
636 conditions. For example, Larson and Pierce [103] have reported that SOM improves the soil to  
637 accept, hold, and release nutrients, water and other soil chemical ingredients to plants, recharge  
638 surface water to groundwater; support root growth through soil structure stability, maintain soil  
639 biotic habitat; and resist soil degradation. The selection of DBD using the PCA could also  
640 confirm the basic principle of the soil to restrict water flow and plant root growth when DBD  
641 increases [105, 106].

642

## 643 **Conclusions**

644 This study revealed that soil properties and nutrient stocks affected significantly by the cropping  
645 and land-use systems (CLUS) in the study sub-catchment. The natural forest (NF) followed by  
646 the treated gully (TG) were attempted to maintain the sustainability of the soil properties as  
647 compared to the other CLUS. All the soil chemical properties except exchangeable sodium (Ex



648 Na) showed the highest values in NF and TG. Similarly, NF followed by TG showed a lower dry  
649 bulk density than the other CLUS. Conversely, the soil properties and nutrient stocks determined  
650 from the untreated gully (UTG) followed by tef mono-cropping (TM) showed a seriously  
651 degraded soil quality indicators. The soil properties status determined from maize mono-  
652 cropping (MM) is by far better than that of irrigated intercropping and crop rotation fields. The  
653 highest Ex Na was reported from the irrigation fields, particularly from the intercropping systems  
654 in which this demands serious attention to decrease and maintain soil sodium status. However,  
655 most of the other soil properties and nutrient stocks (SOC and TN) showed a better improvement  
656 in intercropping than crop rotation fields. In this study, the soil properties values generally  
657 showed an early warning about the severity of soil physical and nutrient degradation in some of  
658 the CLUS such as UTG and TM followed by the irrigated fields. In the study area, the CLUS  
659 having a better soil prosperities and nutrient stocks were reported in descending order as NF, TG  
660 and MM. It is thus suggested that implementation of appropriate intercropping and crop rotation  
661 systems (e.g., use of legume crops and trees) and best soil management practices to improve and  
662 maintain the soil quality of the study sub-catchment conditions. For further monitoring of the  
663 effects of the CLUS on soil quality in the study sub-catchment conditions, attention should be  
664 given to the PCA selected variables (CEC, SOC, DBD, A<sub>h</sub>, Ex Na, TN, and Pav). These seven  
665 variables are explained for 87% of the soil quality variability due to the CLUS. Such selections  
666 of few relevant soil parameters are helpful as a means to assess soil properties that leads to quick  
667 monitoring (rapid and inexpensive) and effective decision-making against the effects of each  
668 CLUS on soil properties and nutrient stocks in the study sub-catchment conditions.

669

#### 670 **Data availability**

671 The data used to support the findings of this study are available from the corresponding author  
672 upon request.

673

#### 674 **Conflict of interest**

675 The author declares that there is no conflict of interest.

676

#### 677 **Acknowledgements**



678 This research was financial supported by University of Aksum (Ethiopia) under the terms of  
679 grant no. AKU/IG/RCSD/1092/07. The author gratefully acknowledged the financial support  
680 provided by Aksum University to conduct this study. The author also highly appreciated the  
681 farmers and development agents who involved in the identification and characterization of the  
682 different cropping and land-use systems. The support provided during the soil sample collection  
683 by Mr. Kahsu Kidane (Development Agent) is highly appreciated. The assistance offered by the  
684 village administration and development agents during all the discussions and data collection  
685 processes are also highly acknowledged.

686

## 687 **References**

- 688 1. Lal R. Soil erosion problems on alfisols in Western Nigeria, VI. Effects of erosion on experimental plots.  
689 *Geoderma*. 1981; 25: 215-230.
- 690 2. Arshad MA, Martin S. 2002. Identifying critical limits for soil quality indicators in agro-ecosystems. *Agric*  
691 *Ecosyst Environ*. 2002; 88:153-160.
- 692 3. Yildirim E, Guvenc I. Intercropping based on cauliflower: more productive, profitable and highly  
693 sustainable. *Eur J Agron*. 2005; 22: 11-18.
- 694 4. Sharma KL, Mandal B, Venkateswarlu B. Soil quality and productivity improvement under rainfed  
695 conditions - Indian perspectives. In: Abrol V, Sharma P, editors. *Resource management for sustainable*  
696 *agriculture*. InTech, India, 2012; p. 203-238.
- 697 5. Zhao Q, Liu S, Deng L, Dong S, Wang C. Soil degradation associated with water-level fluctuations in the  
698 Manwan Reservoir, Lancang River Basin. *Catena*. 2014. 113: 226-235.
- 699 6. Negasa T, Ketema H, Legesse A, Sisay M, Temesgen H. Variation in soil properties under different land  
700 use types managed by smallholder farmers along the toposequence in Southern Ethiopia. *Geoderma*. 2017;  
701 290: 40-50.
- 702 7. Karlen DL, Mausbach MJ, Doran JW, Cline RG, Harris RF, Schuman GE. Soil quality: a concept,  
703 definition, and framework for evaluation. *Soil Sci Soc Am J*. 1997; 61: 4-10.
- 704 8. Mairura FS, Mugendi DN, Mwanje JI, Ramisch JJ, Mbugua PK, Chianu JN. Scientific evaluation of  
705 smallholder land use knowledge in Central Kenya. *Land Degrad. Dev*. 2008; 19: 77-90.
- 706 9. Tesfahunegn GB. Soil quality indicators response to land use and soil management systems in northern  
707 Ethiopia's catchment. *Land Degrad. Dev*. 2016; 27: 438-448.
- 708 10. Hurni H, Tato K, Zeleke G. The implications of changes in population, land use, and land management for  
709 surface runoff in the upper Nile basin area of Ethiopia. *Mt Res Dev*. 2005; 25: 147-154.
- 710 11. Brunner AC, Park SJ, Ruecker, GR, Vlek PLG. Erosion modeling approach to simulate the effect of land  
711 management options on soil loss by considering catenary soil development and farmers perception. *Land*  
712 *Degrad Dev*. 2008; 19: 623-635.
- 713 12. Jien S, Wang C. Effects of biochar on soil properties and erosion potential in a highly weathered soil.  
714 *Catena*. 2013; 110: 225-233.
- 715 13. Ghaemi M, Astaraei AR, Emami H, Mahalati MN, Sanaeinejad SH. Determining soil indicators for soil  
716 sustainability assessment using principal component analysis of Astan Quds- East of Mashhad- Iran. *J soil*  
717 *sci plant nutr*. 2014; 14: 987-1004.
- 718 14. Trivedi P, Delgado-Baquerizo M, Anderson IC, Singh BK. Response of soil properties and microbial  
719 communities to agriculture: Implications for primary productivity and soil health indicators. *Front. Plant*  
720 *Sci*. 2016; DOI: [10.3389/fpls.2016.00990](https://doi.org/10.3389/fpls.2016.00990). Accessed Nov 25, 2017.
- 721 15. Chemed M, Kibret K, Fite T. Influence of different land use types and soil depths on selected soil  
722 properties related to soil fertility in Warandhab area, Horo Guduru Wallaga Zone, Oromiya, Ethiopia. *Int J*  
723 *Environ Sci Nat Res*. 2017;4 (2): 555634.
- 724 16. Behailu M. Assessment and optimisation of traditional irrigation of vertisols in northern Ethiopia: A case  
725 study at Gumselasa micro-dam using maize as an indicator crop. Unpublished PhD Thesis. 2002; Gent,  
726 Belgium.

- 727 17. Tamene L. Reservoir siltation in the drylands of northern Ethiopia: causes, source areas and management  
728 options. Ph.D. Thesis. 2005; University Bonn.
- 729 18. Fantaw A. An Over View of Salt Affected Soils and their Management in Ethiopia. Paper Presented in the  
730 Third International Workshop on Water Management Project. 2007; 19-21 Sep 2007, Haramaya University,  
731 Haramaya, Ethiopia Accessed June 27, 2017.  
732 [https://www.wau.boku.ac.at/fileadmin/data/H03000/H81000/H81500/waterman/Workshop\\_III\\_Haramaya.](https://www.wau.boku.ac.at/fileadmin/data/H03000/H81000/H81500/waterman/Workshop_III_Haramaya.pdf)  
733 [pdf](https://www.wau.boku.ac.at/fileadmin/data/H03000/H81000/H81500/waterman/Workshop_III_Haramaya.pdf)
- 734 19. Wang X, Dong S, Yang B, Li Y, Su X. The effects of grassland degradation on plant diversity, primary  
735 productivity and soil fertility in the alpine region of Asia's headwaters. *Environ Monit Assess.* 2014; 186:  
736 6903-6917.
- 737 20. Moges G, Hengsdijk H, Jansen HC. Review and quantitative assessment of ex-situ household rainwater  
738 harvesting systems in Ethiopia. *Agric Water Manage.* 2011; 98: 1215-1227.
- 739 21. Dile YT, Karlberg L, Temesgen M, Rockström J. The role of water harvesting to achieve sustainable  
740 agricultural intensification and resilience against water related shocks in sub-Saharan Africa. *Agric Ecosyst*  
741 *Environ.* 2013; 181: 69-79.
- 742 22. Feng Z, Wang X, Feng Z. Soil N and Salinity leaching after the autumn irrigation and its impact on ground  
743 water in Hetao irrigation district China. *Agric Water Manage.* 2005; 71: 131-143.
- 744 23. Yimer F, Ledin S, Abdulakdir A. Changes in soil organic carbon and total nitrogen contents in three  
745 adjacent land use types in the Bale Mountains, south-eastern highlands of Ethiopia. *Forest Ecol Manag.*  
746 2007; 242: 337-342.
- 747 24. Fikadu G, Abdu A, Mulugeta, L, Aramde F. Effects of different land uses on soil physical and chemical  
748 properties in Wondo Genet area, Ethiopia. *N Y Sci J.* 2013; 2012: 5(11).
- 749 25. Lal R. Soil carbon sequestration to mitigate climate change. *Geoderma.* 2004; 123: 1-22.
- 750 26. Mandal B, Majumder B, Bandopadhyay PK. The potential of cropping systems and soil amendments for  
751 carbon sequestration in soils under long-term experiments in subtropical India. *Glob Change Biol.* 2007;  
752 13: 357-369.
- 753 27. Yesilonis I, Szlavecz K, Pouyat R, Whigham D, Xia L. Historical land use and stand age effects on forest  
754 soil properties in the Mid-Atlantic US. *Forest Ecol Manag.* 2016; 370: 83-92.
- 755 28. Iqbal M, Es HMV, Ul-Hassan A, Schindelbeck RR, Clune BNM. Soil health indicators as affected by long-  
756 term application of farm manure and cropping patterns under semi-arid climates. *Int J Agric Biol.* 2014; 16:  
757 242-250.
- 758 29. Bilošová H, Šarapatka B, Štýbnarová M, Mičová P, Svozilová M. Nitrogen leaching from grassland  
759 ecosystems managed with organic fertilizers at different stocking rates. *Arch Agron Soil Sci.* 2017;  
760 63(11):1535-1545.
- 761 30. Dallal RC. Effect of intercropping maize with pigeon peas on grain yield and nutrient uptake. *Exp Agric.*  
762 1974; 10: 219-224.
- 763 31. Sharaiha RK, Saub HM, Kafawin O. Varietal response of potato, bean and corn to intercropping. *Dirasat*  
764 *Agric Sci.* 2004; 31: 1-11.
- 765 32. Nursima KA. Profitability of intercropping corn with mungbean and peanut. *USM R & D J.* 2009; 17: 65-  
766 70.
- 767 33. Andrews SS, Carroll CR. Designing a decision tool for sustainable agroecosystem management: Soil  
768 quality assessment of a poultry litter management case study. *Ecol. Appl.* 2001; 11: 1573-1585.
- 769 34. Hill RL. Long-term conventional and no-tillage effects on selected soil physical properties. *Soil Sci Soc*  
770 *Am J.* 1990; 54: 161-166.
- 771 35. Appireddy GK, Saha S, Mina BL., Kundu S, Selvakumar G, Gupta HS. Effect of organic manures and  
772 integrated nutrient management on yield potential of bell pepper (*Capsicum annum*) varieties and on soil  
773 properties. *Arch Agron Soil Sci.* 2008; 54(2): 127-137.
- 774 36. Senjobi BA, Ogunkunle AO. Effect of different land use types and their implications on land degradation  
775 and productivity in Ogun State, Nigeria. *J Agric Biotech Sustain Dev.* 2011; 3: 7-18.
- 776 37. Ahukaemere CM, Ndukwu BN, Agim LC. Soil quality and soil degradation as influenced by agricultural  
777 land use types in the humid environment. *Int J Forest Soil and Erosion.* 2012; 2: 175-179.
- 778 38. Singh G, Sharma R. Effects of different land use changes and spatial variation in rainfall on soil properties  
779 and soil carbon storage in Western Rajasthan, India. *Ann. Adv. Agric. Sci.* 2017; 1: 43-53.
- 780 39. Singh MJ, Khera KL. Physical indicators of soil quality in relation to soil erodibility under different land  
781 uses. *Arid Land Res Manag.* 2009; 23: 152-167.
- 782 40. Romig DE, Garlynd MJ, Harris RF, McSweeney K. How farmers assess soil health and quality. *J. Soil*  
783 [Water Conserv.](https://doi.org/10.1016/0016-7199(95)00029-9) 1995; 50: 229-236

- 784 41. Lemenih M, Hanna F. Soil Carbon Stocks and turnovers in various vegetation types and arable lands along  
785 an elevation gradient in Southern Ethiopia. *Geoderma*. 2004; 123: 177-188.
- 786 42. Batjes NH. Organic carbon stocks in the soils of Brazil. *Soil Use Manag.* 2005; 21: 22-24.
- 787 43. Reed MS, Dougill AJ, Taylor MJ. Integrating local and scientific knowledge for adaptation to land  
788 degradation: Kalahari rangeland management options. *Land Degrad. Dev.* 2007; 18: 249-268
- 789 44. Ethiopian Mapping Agency (EMA). Ethiopia 1:50000 topographic maps, Aksum Sheet. 1997. Addis  
790 Ababa, Ethiopia.
- 791 45. Food and Agriculture Organization of the United Nations (FAO). The Soil and Terrain Database for  
792 Northeastern Africa (CDROM). 1998; FAO, Rome, Italy.
- 793 46. Gee GW, Bauder JW. Particle-size analysis. In: Klute A, editor. *Methods of soil analysis*. Part 1, 2nd  
794 edition. Am Soc Agron., Soil Sci Soc Am, Madison, WI, 1986; p. 383-411.
- 795 47. Blake GR, Hartge KH. Bulk density. In: Klute A, editor. *Methods of soil analysis*, Part 1, 2nd edition,  
796 Agronomy Monograph 9, Am. Soc. Agron. Madison, WI, 1986; p. 363-375.
- 797 48. Brady NC, Weil RR. (Eds.) *The Nature and Properties of Soils*, 13th edition. Prentice-Hall, New Jersey;  
798 2002.
- 799 49. Thomas GW. Soil pH and soil acidity. In: Sparks, D.L. (Ed.), *Methods of Soil Analysis*. Part 3. Chemical  
800 Methods. Soil Sci. Soc. Am. J. Madison, WI, 1996; p. 475-490.
- 801 50. Rhoades JD. Soluble salts. In: Page AL, editor. *Methods of soil analysis*. Vol. 2, Am Soc Agron, Soil Sci  
802 Soc Am, Madison, WI, 1982a; p. 167-179.
- 803 51. Bremner J., Mulvaney CS. Nitrogen total. In: Page, A.L. (Ed.), *Method of Soil Analysis*. Part 2. Chemical  
804 and Microbiological Properties. Agron. Monogr., 9. Am. Soc. Agron, Wisconsin, WI, 1982; p. 595-624.
- 805 52. Olsen SR, Sommers LE. Phosphorus. In: Page AL, editor. *Method of soil analysis*. Part 2. Chemical and  
806 microbiological properties. Agronomy Monograph 9, Am Soc Agron. Wisconsin, WI, 1982; p. 403-430.
- 807 53. Anderson JM, Ingram JSI. *Tropical Soil Biology and Fertility. A handbook of methods*. CAB International:  
808 Wallingford; 1993..
- 809 54. Rhoades JD. Cation exchange capacity. In: Page AL, Miller RH, Keeney DR, editors. *Methods of soil*  
810 *analysis*. Part 2, Agronomy Monograph 9, Am Soc Agron, Madison, WI, 1982b; p. 149-157.
- 811 55. Black CA, Evans DD, White JL, Ensminger LE, Clark FE. (Eds). *Methods of Soil Analysis*. Part 1.  
812 Physical and mineralogical properties, including statistics of measurement and sampling. Am Soc Agron.:  
813 Madison, WI; 1965.
- 814 56. Pieri CJMG. *Fertility of Soils: A Future for Farming in the West African Savannah*. Springer-Verlag,  
815 Berlin; 1992.
- 816 57. Serme I, Ouattara K, Ouattara B, Taonda SJB. Short term impact of tillage and fertility management on  
817 Lixisol structural degradation. *Int. J. Agric. Policy Res.* 2016; 4: 1-6.
- 818 58. Richards LA. Diagnosis and improvement of saline and alkali soils. In: Richards LA, editors. *Handbook of*  
819 *U.S. Dept. of Agriculture*, Washington, 1954; p. 4-160.
- 820 59. Seilsepo M, Rashidi M. Modeling of soil sodium adsorption ratio based on soil electrical conductivity.  
821 *ARPJ Agric Biol Sci.* 2008; 3: 27-31.
- 822 60. Elbashier MM, Ebrahim MH, Musa AA, Ali AA, Mohammed MA. Efficiency of two models for prediction  
823 of exchangeable sodium percentage from sodium adsorption ratio on saline and non saline soil. *Univ J*  
824 *Agric Res.* 2016; 4: 32-36.
- 825 61. Zhang CH, Wang ZM, Ju WM, Ren CY. Spatial and temporal variability of soil C/N ratio in Songnen  
826 plain maize belt. *Environ Sci.* 2011; 32: 1407-1414.
- 827 62. Ge S, Xu H, Ji M, Jiang Y. Characteristics of soil organic carbon, total nitrogen, and C/N Ratio in Chinese  
828 Apple Orchards. *Open J Soil Sci.* 2013; 3: 213-217
- 829 63. Wu HB, Guo ZT, Peng CH. Changes in terrestrial carbon storage with global climate changes since the last  
830 interglacial. *Quat. Sci.* 2001; 21: 366-376.
- 831 64. Ellert BH, Bettany ET. Calculation of organic matter and nutrients stored in soils under contrasting  
832 management regimes. *Can J Soil Sci.* 1995; 75: 529-538.
- 833 65. Brejda JJ, Karlen DL, Smith JL, Allan DL. Identification of regional soil quality factors and indicators: II.  
834 Northern Mississippi loess hills and Palouse prairie. *Soil Sci Soc Am J.* 2000; 64: 2125-2135.
- 835 66. Jagadamma S, Lal R, Hoefl RG, Nafziger ED, Adey EA. Nitrogen fertilization and cropping system  
836 impacts on soil properties and their relationship to crop yield in the central Corn Belt, USA. *Soil Tillage*  
837 *Res.* 2008; 98: 120-129.
- 838 67. Barrios E, Trejo MT. Implications of local soil knowledge for integrated soil management in Latin  
839 America. *Geoderma*. 2003; 111: 217-231.

- 840 68. Mairura FS, Mugendi DN, Mwanje JI, Ramisch JJ, Mbugua PK, Chianu JN. Integrating scientific and  
841 farmers' evaluation of soil quality indicators in Central Kenya. *Geoderma*. 2007; 139: 134-143.
- 842 69. Tesfahunegn GB, Tamene L, Vlek PLG. Evaluation of soil quality identified by local farmers in Mai-  
843 Negus catchment, northern Ethiopia. *Geoderma*. 2011; 163: 209-218.
- 844 70. Shepherd G, Bureh RJ, Gregory PJ. Land use affects the distribution of soil inorganic nitrogen in  
845 smallholder production systems in Kenya. *Biol. Fertil. Soils*. 2000; 31: 348-355.
- 846 71. Kauffmann S, Sombroek W, Mantel S. Soils of rainforests: characterization and major constraints of  
847 dominant forest soils in the humid tropics. In: Schulte A, Ruhiyat D, Editors. *Soils of tropical forest  
848 ecosystems: characteristics, ecology and management*. pringerVerlag, Berlin,1998; p. 9-20.
- 849 72. Voundi Nkana JC, Tonye J. Assessment of certain soil properties related to different land-use systems in  
850 the Kaya watershed of the humid forest zone of Cameroon. *Land Degrad. Dev.* 2002; DOI:  
851 [10.1002/Idc.519](https://doi.org/10.1002/Idc.519). Accessed 2018 May 25.
- 852 73. Agoumé V, Birang AM. Impact of land-use systems on some physical and chemical soil properties of an  
853 Oxisol in the humid forest Zone of Southern Cameroon. *Tropicultura*2009; 27: 15-20.
- 854 74. Arshad MA, Lowery B, Grossman B. Physical tests for monitoring soil quality. In: Doran JW, Jones AJ,  
855 editors, *Methods for assessing soil quality*. SSSA Spec. Publ., vol. 49. Soil Sci Soc Am.: Madison, WI,  
856 1996; p. 123-142.
- 857 75. Sojka RE, Upchurch DR. Reservations regarding the soil quality concept. *Soil Sci Soc Am J*. 1999; 63:  
858 1039-1054.
- 859 76. Evanylo G, McGuinn R. Agricultural management practices and soil quality: measuring, assessing, and  
860 comparing laboratory and field test kit indicators of soil quality attributes. Virginia Cooperative Extension  
861 Knowledge for Common Wealth, Publication Number 452-400, posted March 2000, Virginia State  
862 University, USA; 2000..
- 863 77. Sally DL, Karle DL. Bulk density as a soil quality indicator during conversion to no-tillage. *Soil Tillage  
864 Res.* 2004; 78: 143-149.
- 865 78. Moghadam MK, Darvishi HH, Javaheri M. Evaluation agronomic traits of soybean affected by  
866 vermicompost and bacteria in sustainable agricultural system. *Int. J. Biosci.* 2014; 5: 406-413.
- 867 79. Ayoola OT. Effects of fertilizer treatments on soil chemical properties and crop yields in a Cassava-based  
868 Cropping System. *J. Appl. Sci Res.* 2006; 2(12): 1112-1116.
- 869 80. Landon JR. *A Booker Tropical Soil Manual: A Handbook for Soil Survey and Agricultural Land  
870 Evaluation in the Tropics and Subtropics*. Booker Tate, Thame, Oxon, UK; 1991.
- 871 81. Sanchez PA, Couto W, Boul SW. The fertility capability soil classification system: interpretation,  
872 applicability and modification. *Geoderma*. 1982 ; 27: 83-309.
- 873 82. Tesfahunegn GB, Tamene L, Vlek PLG, Mekonnen K. Assessing farmers' knowledge of weed species,  
874 crop type and soil management practices in relation to soil quality status in Mai-Negus catchment, northern  
875 Ethiopia. *Land Degrad. Dev.* 2016; 27: 120-133.
- 876 83. Solomon D, Fritzsche F, Tekalign M, Lehumann J, Zech W. Soil organic matter composition in sub-humid  
877 Ethiopia highlands as influenced by Deforestation and agricultural management. *Soil Sci Soc Am J*. 2002;  
878 66: 68-82.
- 879 84. Nweke IA, Nnabude PC. Organic carbon, total nitrogen and available phosphorous Concentration in  
880 aggregate fractions of four soils under two land-use systems. *Int J Res Appl.* 2014; 2: 273-288.
- 881 85. Flynn CJO', Fenton O, Wall D, Brennan RB, Mclaughlin MJ, Healy MG. Influence of soil phosphorus  
882 status, texture, pH and metal content on the efficacy of amendments to pig slurry in reducing phosphorus  
883 losses. *Soil Use Manage.* 2018; 34: 1-8.
- 884 86. Craul PJ. *Urban Soils: Applications and Practices*. Wiley, Toronto;1999.
- 885 87. Reeves DW The role of soil organic matter in maintaining soil quality in continuous cropping systems. *Soil  
886 Tillage Res.* 1997; 43: 131-167.
- 887 88. Kay BD, Angers DA. Soil Structure, in: Sumner, M.E. (Ed.), *Handbook of Soil Science*. CRC Press: Boca  
888 Raton, USA, 1999; p. A-229 - A-276.
- 889 89. Bowman, RA, Reeder JD, Lober RW. Changes in soil properties in a Central Plains rangeland soil after 3,  
890 20, and 60 years of cultivation. *Soil Sci.* 1990; 150: 851-857.
- 891 90. Bremer E, Janzen HH, Johnston AM. Sensitivity of total light fraction and mineralizable organic matter to  
892 management practices in a Lethbridge soil. *Can J Soil Sci.* 1994; 74: 131-138.
- 893 91. Johnson DW, Curtis PS. Effects of forest management on soil C and N storage: meta-analysis. *For. Ecol.  
894 Manage.* 2001; 140:227-238.



- 895 92. Yeshaneh GT. Assessment of soil fertility variation in different land uses and management practices in  
896 Maybar Watershed, South Wollo Zone, North Ethiopia. *Int. J. Environ. Bioremedi. Biodegrad.* 2015; 3: 15-  
897 22.
- 898 93. Campbell CA, McConkey BG, Zentner RP, Sells F, Curtin D. Long-term effects of tillage and crop  
899 rotations on soil organic carbon and total nitrogen in a clay soil in south western Saskatchewan. *Can. J. Soil*  
900 *Sci.* 1996; 76: 395-340.
- 901 94. Duff B, Rasmussen PE, Smiley RW. Wheat/fallow systems in semi-arid regions of the Pacific, north-west  
902 America. In: Barnett V, Payne R, Steiner R, editors. *Agricultural sustainability: economic, environmental*  
903 *and statistical considerations.* John Wiley and Sons, Inc., New York, 1995; p. 85-109.
- 904 95. Schlesinger WH, Lichter J. Limited carbon storage in soil and litter of experimental forest plots under  
905 increased atmospheric CO<sub>2</sub>. *Nature.* 2001; 411: 466-468.
- 906 96. Gunther S, Holger K. Bulk soil C to N ratio as a simple measure of net N mineralization from stabilized  
907 soil organic matter in sandy arable soils. *Soil Biol. Biochem.* 2003; 35: 629-632.
- 908 97. Bird MI, Veenendaal EM, Lloyd J. Soil carbon inventories and d<sup>13</sup>C along a moisture gradient in Botswana.  
909 *Glob Change Biol.* 2004; 10: 342-349.
- 910 98. Saiz G, Bird M, Domingues T, Schrodt F, Schwarz M, Feldpausch T, Veenendaal E, Djagbletey G, Hien F,  
911 Compaore H, Diallo A, Lloyd J. Variation in soil carbon stocks and their determinants across a  
912 precipitation gradient in West Africa. *Glob Change Biol.* 2012; 18: 1670-1683.
- 913 99. Amundson R. The carbon budget in soils. *Annu. Rev Earth Pl Sc.* 2001; 29: 535-562.
- 914 100. Johnson RA, Wichern DW. *Applied Multivariate Statistical Analysis.* Prentice-Hall, Englewood Cliffs, NJ;  
915 1992.
- 916 101. Anderson JPE, Domsch KH. Quantities of plant nutrients in the microbial biomass of selected soils. *Soil*  
917 *Sci.* 1980; 130: 211-216.
- 918 102. Sparling G.P. Ratio of microbial biomass carbon to soil organic carbon as a sensitive indicator of changes  
919 in soil organic matter. *Aust. J. Soil. Res.* 1992; 30: 195-207.
- 920 103. Larson WE, Pierce FJ. The dynamics of soil quality as a measure of sustainable management. In: Doran  
921 JW, Coleman DG, Bezdick DF, Stewart BA, editors. *Defining soil quality for sustainable environment.*  
922 *1st Edition, Soil Sci Soc Am, Pub. No. 35, Madison, WI, 1994; p. 37-52.*
- 923 104. Shukla, M.K., Lal, R. & Ebinger, M. Determining soil quality indicators by factor analysis. *Soil Tillage*  
924 *Res.* 2006; 87: 194-204.
- 925 105. Tisdall JM, Oades JM. Organic matter and water-stable aggregates in soils. *J Soil Sci.* 1982; 33: 141-163.
- 926 106. Doran JW. Soil health and global sustainability: translating science into practice. *Agric. Ecosyst. Environ.*  
927 *2002; 88: 119-127.*
- 928
- 929

930  
931  
932  
933  
934  
935  
936  
937  
938  
939  
940  
941  
942  
943  
944  
945  
946  
947  
948  
949  
950  
951  
952  
953  
954  
955  
956  
957  
958  
959  
960  
961  
962  
963  
964  
965  
966

## **List of Tables and Figure**

### **List of Tables**

**Table 1.** Cropping and land-use systems identified in the Dura sub-catchment, northern Ethiopia.

**Table 2.** Topographic features of each soil sampling unit selected from the long-term irrigated and non-irrigated cropping and land-use systems in the Dura sub-catchment, northern Ethiopia.

**Table 3.** Mean soil physical properties response to the cropping and land-use systems at 0-20 cm depth in the Dura sub-catchment, northern Ethiopia.

**Table 4.** Mean soil chemical properties response to the cropping and land-use systems at 0-20 cm depth in the Dura sub-catchment, northern Ethiopia.

**Table 5.** Mean SOC and TN stocks and reduction in stocks due to the cropping and land-use systems at 0-20cm soil depth in Dura sub-catchment, northern Ethiopia.

**Table 6.** Results of principal component analysis of soil properties variability across the cropping and land-use systems in the Dura sub-catchment, northern Ethiopia.

### **List of Figure**

**Figure 1.** Location of the study area: Ethiopia (A), Tigray Region (B), and Dura catchment (C).

967 **List of Tables**

968 **Table 1.** Cropping and land-use systems identified in the Dura sub-catchment, northern Ethiopia.

| S. no. | Cropping and land-use system                                                          | Description                                                                                                                                                                                                                                                                                                                                                                                                                                                                                                                                                                                                                                                                                                                                                           |
|--------|---------------------------------------------------------------------------------------|-----------------------------------------------------------------------------------------------------------------------------------------------------------------------------------------------------------------------------------------------------------------------------------------------------------------------------------------------------------------------------------------------------------------------------------------------------------------------------------------------------------------------------------------------------------------------------------------------------------------------------------------------------------------------------------------------------------------------------------------------------------------------|
| 1      | <sup>a</sup> Tef ( <i>Eragrostis tef</i> (Zucc) Trot) mono-cropping (TM)              | Continuous tef crop has been grown (mono-cropped) for more than 18-years at the same field. Inorganic fertilizer of 100 kg ha <sup>-1</sup> DAP and 50 kg ha <sup>-1</sup> urea applied in each crop seasons, but recently the application was 100 kg ha <sup>-1</sup> of each these fertilizers. Tillage frequency to prepare seed bed ranges between three and six times, depending on field soil conditions and farmers resources availability. The tef fields are located near to the irrigated fields, but far from homesteads. Tef is rain-fed cropping system. Soil and water conservation (SWC) practices observed only at the boarder of the fields. No manure or compost fertilizer applied. Soil samples were collected just after harvested the tef crop. |
| 2      | Maize ( <i>Zea mays L.</i> ) mono-cropping (MM)                                       | Continuous maize crop has been grown for more than 30-years at the same field. Fields are located just at homesteads and received about 5 to 8 tones ha <sup>-1</sup> of manure each year. Sometimes, 100 kg DAP ha <sup>-1</sup> and 50 kg urea ha <sup>-1</sup> were applied if organic sources are small or unavailable. Tillage frequency is at most three times. This is rain-fed cropping system, and relatively it has intensive SWC practices. Soil samples were collected just after harvested the maize crop.                                                                                                                                                                                                                                               |
| 3      | Cauliflower ( <i>Brassica oleracea var. botrytis</i> ) with maize intercropping (IC1) | Intercropping of cauliflower with maze was practiced during the irrigation period for a consecutive of four years. Furrow irrigation was used. Maize was planted two weeks after cauliflower. Soil samples were collected at maturity stage of both crops. During the rain-fed season tef intercropped with “ <i>Nuhig</i> ” ( <i>Guizotia abyssinica L.</i> ) was used as to rotate the system. Fertilizer rate of 100 kg DAP ha <sup>-1</sup> and 50 kg urea ha <sup>-1</sup> were applied to all cropping seasons. The land was ploughed three times. SWC practices were found at field boarders. Small rate of manure/compost (1 ton ha <sup>-1</sup> ) was applied occasionally just at planting of cauliflower.                                                 |
| 4      | Red beet ( <i>Beta Vulgaris</i> ) with maize intercropping (IC2)                      | Intercropping of red beet with maize was practiced using furrow irrigation for a consecutive of five years. Maize was planted three weeks after red beet. Soil samples were collected at maturity stage of both crops. During the rain-fed season tef intercropped with “ <i>Nuhig</i> ” ( <i>Guizotia abyssinica L.</i> ) was used to rotate the system. Fertilizer rate of 100 kg DAP ha <sup>-1</sup> and 50 kg urea ha <sup>-1</sup> were applied during all cropping seasons. The land was ploughed three times. A small rate of manure/compost (1 ton ha <sup>-1</sup> ) was applied occasionally just at planting of red beet.                                                                                                                                 |
| 5      | Cauliflower - tef - maize rotation (R1)                                               | Irrigated (furrow irrigation) sole cauliflower was first planted. After this crop harvested, rain-fed tef was planted. After tef, irrigated maize was planted and then the rotation was continued to cauliflower followed by maize again for two terms (6 years). Soil samples were taken during the maturity stage of irrigated maize crop at the end of term two. The fertilizer rate applied for all of the crops included 100 kg DAP and 50 kg urea ha <sup>-1</sup> . A small rate of manure/compost (1 ton ha <sup>-1</sup> ) was applied occasionally just at planting time of cauliflower and maize.                                                                                                                                                          |
| 6      | Onion ( <i>Allium cepa L.</i> ) - maize - onion rotation (R2)                         | Irrigated (furrow irrigation) onion was first planted. After this crop, rain-fed maize was planted as a rotational crop. After maize, irrigated onion was planted again and then continue the rotation to rain-fed maize and back to onion irrigation for two terms (6 years). Soil samples were taken during maturity stage of the irrigated onion at the end of the term two. The fertilizer rate applied to both crops included 100 kg DAP ha <sup>-1</sup> and 50 kg urea ha <sup>-1</sup> . A small rate of manure/compost (1 ton ha <sup>-1</sup> ) was applied occasionally just at planting of irrigated onion.                                                                                                                                               |
| 7      | Treated gully (TG)                                                                    | The gully in the irrigation command area was treated using Sesbania ( <i>Sesbania sesban</i> ) and Leucena ( <i>Leuceana leucecephala</i> ) legume trees which established 20-years ago. Naturally regenerated grasses have also grown well on the bed and sides of the gully and have used only by cut and carrying system. The gully treatment has entirely dependent on biological SWC. Excess irrigation water from the fields was drained to the treated gully.                                                                                                                                                                                                                                                                                                  |
| 8      | Untreated gully (UTG)                                                                 | The untreated gully had no improved management practices, e.g., no SWC, no enrichment of tree, shrub and grass species. This land has not been contributed to the local community livelihood for many years. According to local farmers, the estimated age of gully is more than 100 years.                                                                                                                                                                                                                                                                                                                                                                                                                                                                           |
| 9      | Natural forest land system (NF)                                                       | This is less disturbed land which is used as a reference. NF has native trees, vegetation and grass cover. Example of dominant tree species include: <i>Acacia etbaica</i> , <i>Acacia abyssinica</i> , <i>Olea europaea</i> , <i>Acacia lahai</i> , <i>Dodonaea euquistifolia</i> , <i>Dovyelis abyssinica</i> ; and grass species such as <i>Datura Stramonium L.</i> , <i>Cynodon dactylon (L.) pers.</i> , <i>Trifolium rueppellianum Fresen.</i>                                                                                                                                                                                                                                                                                                                 |

969 DAP, Di ammonium phosphate

970 <sup>a</sup>Tef followed by maize is the dominant crop in the study catchment of northern Ethiopia. Tef is an annual cereal  
 971 crop (belonging to the grass family) with very fine seeds that requires field with fine seedbeds.



972 **Table 2.** Topographic features of each soil sampling unit selected from the long-term irrigated and non-  
 973 irrigated cropping and land-use systems in the Dura sub-catchment, northern Ethiopia.

| Cropping and land-use system | Sampling point 1 |              |                  |           | Sampling point 2 |              |          |           | Sampling point 3 |              |          |
|------------------------------|------------------|--------------|------------------|-----------|------------------|--------------|----------|-----------|------------------|--------------|----------|
|                              | Elevation<br>(m) | Slope<br>(%) | UTM <sup>a</sup> |           | Elevation<br>(m) | Slope<br>(%) | UTM      |           | Elevation<br>(m) | Slope<br>(%) | Latitude |
|                              |                  |              | Latitude         | Longitude |                  |              | Latitude | Longitude |                  |              |          |
| TM                           | 2066             | 2.0          | 462488           | 1559941   | 2064             | 2.5          | 462412   | 1559951   | 2065             | 2.0          | 462488   |
| MM                           | 2067             | 2.5          | 461736           | 1559812   | 2080             | 3            | 461675   | 1559852   | 2081             | 2.5          | 461736   |
| IC1                          | 2072             | 2.5          | 461924           | 1559672   | 2073             | 2.0          | 461902   | 1559679   | 2068             | 1.5          | 461924   |
| IC2                          | 2039             | 1.3          | 463409           | 1559234   | 2044             | 1.5          | 463411   | 1559229   | 2055             | 2.0          | 463409   |
| R1                           | 2065             | 2.0          | 461903           | 1559794   | 2042             | 1.4          | 463548   | 1559073   | 2040             | 1.5          | 461903   |
| R2                           | 2040             | 1.5          | 463015           | 1559479   | 2047             | 1.5          | 463053   | 1559460   | 2048             | 1.5          | 463015   |
| TG                           | 2042             | 1.5          | 462355           | 1559196   | 2045             | 1.5          | 463554   | 1559211   | 2044             | 1.5          | 462355   |
| UTG                          | 2047             | 1.5          | 462856           | 1559450   | 2049             | 1.5          | 462855   | 1559477   | 2049             | 1.5          | 462856   |
| NF                           | 2105             | 2.5          | 463657           | 1561482   | 2110             | 3.0          | 463,856  | 1561592   | 2103             | 2.0          | 463657   |

974 TM, Tef (*Eragrostis tef* (Zucc) Trot) mono-cropping; MM, Maize (*Zea mays L.*) mono-cropping; IC1; Cauliflower  
 975 (*Brassica oleracea* var. botrytis) with maize intercropping; IC2, Red beet (*Beta Vulgaris*) with maize intercropping;  
 976 R1, Cauliflower-tef-maize rotation; R2, Onion (*Allium cepa L.*)- maize - onion rotation; TG, Treated gully; UTG,  
 977 Untreated gully; NF, Natural forest land-system.

978 <sup>a</sup>Universal Transverse Mercator 37 North (UTM-37N) in meters is the projection system.

979 **Table 3.** Mean soil physical properties variability among the cropping and land-use systems at 0-20 cm  
 980 depth in the Dura sub-catchment, northern Ethiopia.

| Physical soil property    | Cropping and land-use system (CLUS) |        |        |        |        |        |        |        |        | Mean  |
|---------------------------|-------------------------------------|--------|--------|--------|--------|--------|--------|--------|--------|-------|
|                           | TM                                  | MM     | IC1    | IC2    | R1     | R2     | TG     | UTG    | NF     |       |
| Clay (%)                  | 26.3f                               | 32.0e  | 43.7d  | 48.7c  | 54.0b  | 73.7a  | 49.7c  | 36.7e  | 33.7e  | 44.2  |
| Silt (%)                  | 33.4d                               | 39.0b  | 36.7c  | 30.0e  | 33.7d  | 22.7f  | 34.7cd | 25.3f  | 43.3a  | 33.3  |
| Sand (%)                  | 40.3a                               | 29.0b  | 19.7d  | 21.3d  | 12.3e  | 3.7f   | 15.7e  | 38.0a  | 23.0c  | 22.6  |
| DBD (Mg m <sup>-3</sup> ) | 1.59b                               | 1.39f  | 1.47cd | 1.50c  | 1.43e  | 1.45de | 1.32g  | 1.77a  | 1.19h  | 1.46  |
| TP (%)                    | 40.1g                               | 47.5c  | 44.5ef | 43.4f  | 46.2d  | 45.3de | 50.3b  | 33.2h  | 55.1a  | 45.1  |
| SSSI (%)                  | 1.85f                               | 3.93c  | 2.68d  | 2.67d  | 2.218e | 1.99e  | 7.17b  | 1.15g  | 12.1a  | 3.89  |
| A-h (m)                   | 0.104d                              | 0.138c | 0.110d | 0.102d | 0.105d | 0.106d | 0.187b | 0.017e | 0.195a | 0.120 |

981 Means followed by different letters in the same row are significantly different at probability level (P) = 0.05.

982 DBD, dry bulk density; TP, total porosity; SSSI, soil structural stability index; A-h, A-horizon depth; TM,  
 983 Tef(*Eragrostis tef* (Zucc) Trot) mono-cropping system; MM, Maize (*Zea mays L.*) mono-cropping system; IC1;  
 984 Cauliflower (*Brassica oleracea* var. botrytis) with maize intercropping; IC2, Red beet (*Beta Vulgaris*) with maize  
 985 intercropping; R1, Cauliflower - tef - maize rotation; R2, Onion (*Allium cepa L.*) - maize - onion rotation; TG,  
 986 Treated gully; UTG, Untreated gully; NF, Natural forest.

987  
 988  
 989  
 990  
 991  
 992  
 993  
 994  
 995  
 996  
 997

998 **Table 4.** Mean soil chemical properties variability among the cropping and land-use systems at 0-20 cm  
 999 depth in the Dura sub-catchment, northern Ethiopia.

| Chemical soil property                      | Cropping and land-use system (CLUS) |         |         |         |        |         |         |         |         | Mean  |
|---------------------------------------------|-------------------------------------|---------|---------|---------|--------|---------|---------|---------|---------|-------|
|                                             | TM                                  | MM      | IC1     | IC2     | R1     | R2      | TG      | UTG     | NF      |       |
| Soil pH                                     | 6.94f                               | 7.31de  | 7.98bc  | 8.35ab  | 8.50a  | 7.79c   | 7.91bc  | 7.09f   | 7.28e   | 7.68  |
| EC (ds m <sup>-1</sup> )                    | 0.057c                              | 0.333ab | 0.327ab | 0.510a  | 0.273b | 0.390ab | 0.267b  | 0.210bc | 0.230bc | 0.289 |
| CEC (cmol <sub>c</sub> kg <sup>-1</sup> )   | 18.8f                               | 37.8b   | 28.9e   | 30.4de  | 32.2cd | 34.0c   | 50.3a   | 11.4g   | 49.8a   | 32.6  |
| Ex Ca (cmol <sub>c</sub> kg <sup>-1</sup> ) | 8.5f                                | 18.3b   | 12.1e   | 13.3d   | 14.0cd | 14.8c   | 24.8a   | 4.5g    | 25.5a   | 15.1  |
| Ex Mg (cmol <sub>c</sub> kg <sup>-1</sup> ) | 2.7f                                | 8.8c    | 6.3e    | 6.5de   | 7.1d   | 6.8d    | 14.7b   | 1.3g    | 15.1a   | 7.6   |
| Ex Na (cmol <sub>c</sub> kg <sup>-1</sup> ) | 0.040f                              | 0.213d  | 0.667a  | 0.682a  | 0.627b | 0.613b  | 0.450c  | 0.153e  | 0.030f  | 0.386 |
| Ex K (cmol <sub>c</sub> kg <sup>-1</sup> )  | 0.503d                              | 0.797b  | 0.605c  | 0.597c  | 0.623c | 0.627c  | 1.43a   | 0.204e  | 1.39a   | 0.753 |
| SBFC (cmol <sub>c</sub> kg <sup>-1</sup> )  | 11.7e                               | 28.1b   | 19.7d   | 21.1cd  | 22.4c  | 22.9c   | 41.4a   | 6.2f    | 42.0a   | 23.9  |
| ESP                                         | 0.12f                               | 0.45    | 1.40a   | 1.26b   | 1.21b  | 0.97c   | 0.84d   | 0.28e   | 0.06f   | 0.73  |
| BSP                                         | 62.5d                               | 74.3b   | 68.2cd  | 69.4b   | 69.6b  | 67.4d   | 82.3a   | 54.4e   | 84.3a   | 73.3  |
| SAR                                         | 0.011f                              | 0.049   | 0.153a  | 0.140ab | 0.139b | 0.117c  | 0.098d  | 0.034e  | 0.007f  | 0.083 |
| Pav (mg kg <sup>-1</sup> )                  | 2.0gh                               | 13.8c   | 2.8e    | 3.1de   | 3.5d   | 4.0d    | 19.4b   | 1.4h    | 23.9a   | 8.2   |
| OC (%)                                      | 0.643f                              | 1.540c  | 1.250d  | 1.220d  | 1.110e | 1.113e  | 3.520b  | 0.413g  | 4.980a  | 1.754 |
| TN (%)                                      | 0.067f                              | 0.135c  | 0.119d  | 0.116d  | 0.108e | 0.109e  | 0.257b  | 0.034g  | 0.385a  | 0.148 |
| OC:TN                                       | 9.597g                              | 11.407d | 10.50e  | 10.51e  | 10.28f | 10.21f  | 13.696a | 12.147c | 12.935b | 11.87 |

1000 Means followed by different letters in the same rows are significantly different at probability level (P) = 0.05.

1001 pH, hydrogen ion concentration; EC, Electrical conductivity; CEC, cation exchange capacity; Ex Ca, Ex Mg, Ex  
 1002 Na, Ex K, exchangeable calcium, magnesium, sodium, potassium, respectively; SBFC sum of base forming cations;  
 1003 ESP, Exchangeable Na percentage; BSP, Base saturation percentage; SAR, sodium absorption ratio; Pav, available  
 1004 phosphorus; OC, Organic carbon; TN, total nitrogen; OC:TN, ratio of OC to TN.

1005 TM, Teff (*Eragrostis tef* (Zucc) Trot) mono-cropping; MM, Maize (*Zea mays L.*) mono-cropping; IC1, Cauliflower  
 1006 (*Brassica oleracea var. botrytis*) with maize intercropping; IC2, Red beet (*Beta Vulgaris*) with maize intercropping;  
 1007 R1, Cauliflower – teff - maize rotation; R2, Onion (*Allium cepa L.*) - maize - onion rotation; TG, Treated gully;  
 1008 UTG, Untreated gully; NF, Natural forest.

1009

1010

1011 **Table 5.** Mean SOC and TN stocks and reduction in stocks due to the cropping and land-use systems at 0-  
 1012 20 cm soil depth in Dura sub-catchment, northern Ethiopia.

| Cropping and land-use system | SOC stock (Mg C ha <sup>-1</sup> ) | SOC stock reduction (%) | TN stock (Mg N ha <sup>-1</sup> ) | TN stock reduction (%) |
|------------------------------|------------------------------------|-------------------------|-----------------------------------|------------------------|
| TM                           | 10.6e                              | 90.7                    | 1.09e                             | 91.0                   |
| MM                           | 28.5c                              | 74.9                    | 2.67c                             | 78.0                   |
| IC1                          | 23.4d                              | 79.4                    | 2.05d                             | 83.1                   |
| IC2                          | 19.7d                              | 82.7                    | 1.68de                            | 86.2                   |
| R1                           | 16.7de                             | 85.3                    | 1.60de                            | 86.8                   |
| R2                           | 17.1de                             | 84.9                    | 1.28de                            | 89.5                   |
| TG                           | 49.4b                              | 56.5                    | 3.65b                             | 70.0                   |
| UTG                          | 3.50f                              | 96.9                    | 0.25f                             | 97.9                   |
| NF                           | 113.6a                             | 0.00                    | 12.2a                             | 0.00                   |
| Mean                         | 31.0                               | 72.4                    | 2.92                              | 75.8                   |

1013 TM, Teff (*Eragrostis tef* (Zucc) Trot) mono-cropping; MM, Maize (*Zea mays L.*) mono-cropping; IC1, Cauliflower  
 1014 (*Brassica oleracea* var. botrytis) with maize intercropping; IC2, Red beet (*Beta Vulgaris*) with maize intercropping;  
 1015 R1, Cauliflower – teff - maize rotation; R2, Onion (*Allium cepa L.*)- maize - onion rotation; TG, Treated gully;  
 1016 UTG, Untreated gully; NF, Natural forest land system.

1017  
 1018  
 1019  
 1020  
 1021  
 1022  
 1023  
 1024  
 1025

1026 **Table 6.** Results of principal component analysis of soil properties responses to the cropping and land-use  
1027 systems in the Dura sub-catchment, northern Ethiopia.

| Principal component, PC         | PC1                | PC2                | PC3                 | PC4                 | PC5                |               |
|---------------------------------|--------------------|--------------------|---------------------|---------------------|--------------------|---------------|
| Eigenvalue                      | 8.50               | 6.48               | 2.24                | 1.61                | 1.13               |               |
| Variance (%)                    | 30.65              | 24.32              | 17.29               | 7.90                | 6.63               |               |
| Cumulative variance (%)         | 30.65              | 54.97              | 72.26               | 80.16               | 86.79              |               |
| Variables                       | Eigenvectors       |                    |                     |                     |                    | Communalities |
| Cation exchangeable capacity    | <b><u>0.87</u></b> | 0.01               | 0.27                | 0.19                | -0.20              | 0.96          |
| Clay                            | <b>0.75</b>        | 0.07               | 0.17                | -0.27               | -0.04              | 0.92          |
| Silt                            | 0.54               | 0.23               | -0.01               | 0.00                | -0.34              | 0.85          |
| Sand                            | 0.40               | 0.14               | -0.20               | 0.33                | 0.19               | 0.78          |
| Soil organic carbon             | 0.51               | <b><u>0.83</u></b> | -0.13               | -0.02               | 0.03               | 0.93          |
| Soil total nitrogen             | 0.48               | <b>0.81</b>        | -0.14               | 0.001               | <b><u>0.86</u></b> | 0.91          |
| Soil structural stability index | 0.31               | <b>0.79</b>        | 0.52                | 0.09                | -0.03              | 0.86          |
| Dry bulk density                | -0.16              | -0.51              | <b><u>-0.78</u></b> | -0.13               | -0.10              | 0.89          |
| Total porosity                  | 0.16               | 0.50               | <b>0.78</b>         | 0.13                | 0.10               | 0.89          |
| A-horizon depth                 | 0.13               | 0.37               | <b><u>0.76</u></b>  | 0.06                | 0.07               | 0.87          |
| Exchangeable Sodium             | 0.23               | -0.28              | -0.14               | <b><u>-0.74</u></b> | -0.02              | 0.89          |
| Exchangeable Sodium Percentage  | 0.15               | -0.21              | -0.12               | <b>-0.72</b>        | -0.03              | 0.87          |
| Sodium adsorption ratio         | -0.17              | -0.23              | -0.15               | <b>-0.71</b>        | -0.06              | 0.85          |
| Available phosphorus            | 0.47               | 0.25               | 0.15                | 0.18                | <b><u>0.81</u></b> | 0.90          |
| Soil pH                         | 0.29               | 0.22               | 0.32                | 0.21                | 0.52               | 0.75          |
| Exchangeable Calcium            | 0.58               | 0.20               | 0.12                | -0.31               | 0.03               | 0.87          |
| Exchangeable Magnesium          | 0.53               | 0.18               | 0.16                | -0.26               | 0.37               | 0.85          |
| Exchangeable potassium          | 0.55               | 0.15               | 0.24                | 0.17                | 0.45               | 0.87          |
| Electrical conductivity         | 0.52               | 0.02               | 0.23                | 0.56                | 0.34               | 0.74          |
| Sum of base forming cations     | 0.42               | 0.07               | 0.19                | 0.20                | 0.17               | 0.85          |
| Base saturation percentage      | 0.20               | 0.16               | -0.11               | -0.07               | 0.20               | 0.90          |
| Ratio of OC to TN (OC: TN)      | 0.50               | 0.34               | 0.22                | -0.23               | 0.26               | 0.82          |

1028 Underlined boldface eigenvector values corresponded to those highly weighted variables and retained in the PC.

1029

1030

### List of Figure

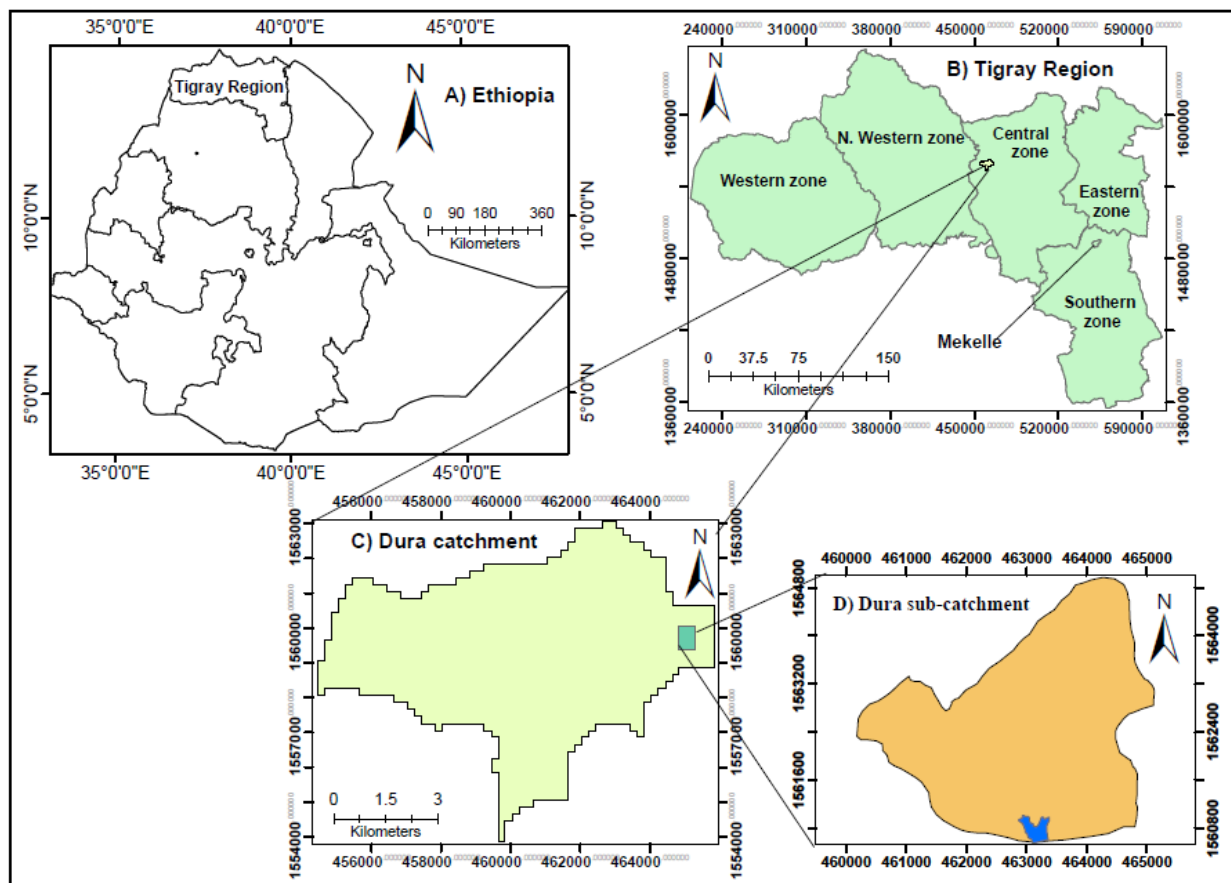

1031

1032 **Figure 1.** Location of the study area: Ethiopia (A), Tigray Region (B), Dura catchment (C) and Dura  
1033 sub-catchment (D). Blue color in the sub-catchment is reservoir.

1034
